# Supplementary material for: Microwave-assisted synthesis and photophysical studies of novel fluorescent N-acylhydrazone and semicarbazone-7-OH-coumarin dyes
Source: Royal Society of Chemistry journal article supplement (doi:10.1039/c6nj01532h), 2016-01-01
Supplement: c6nj01532h1.pdf [file c6nj01532h1.pdf]

## New Journal of Chemistry

# Microwave-Assisted Synthesis and Photophysical Studies of Novel Fluorescent N-acylhydrazone- and Semicarbazone-7-OH- Coumarin Dyes

Thiago Moreira Pereira<sup>1</sup>, Felipe Vitória<sup>1</sup>, Ronaldo Costa Amaral<sup>2</sup>, Kassio P. S. Zanoni<sup>2</sup>,  
Neyde Y. Murakami Iha<sup>2</sup>, Arthur Eugen Kümmerle<sup>1</sup>.

1. Laboratório de Diversidade Molecular e Química Medicinal (LaDMol-QM, Molecular  
Diversity and Medicinal Chemistry Laboratory), Department of Chemistry, Universidade  
Federal Rural do Rio de Janeiro, Seropédica, Rio de Janeiro, 23897-000, Brazil.

2. Laboratory of Photochemistry and Energy Conversion, Departamento de Química  
Fundamental, Instituto de Química, Universidade de São Paulo, São Paulo -  
SP 05508-000, Brazil;

## Supporting Information

### Contents

|                                                                                         |           |
|-----------------------------------------------------------------------------------------|-----------|
| Copies of <sup>1</sup> H NMR, <sup>13</sup> C NMR, IR and Mass Spectra for all products | -----2-21 |
| HPLC analysis of <b>3h</b>                                                              | -----21   |
| pKa determination of <b>3a</b>                                                          | -----22   |
| Photophysical parameters in water (pH = 3.0) at 298 K.                                  | -----23   |

# $^1\text{H}$ NMR, $^{13}\text{C}$ NMR, IV and Mass Spectra

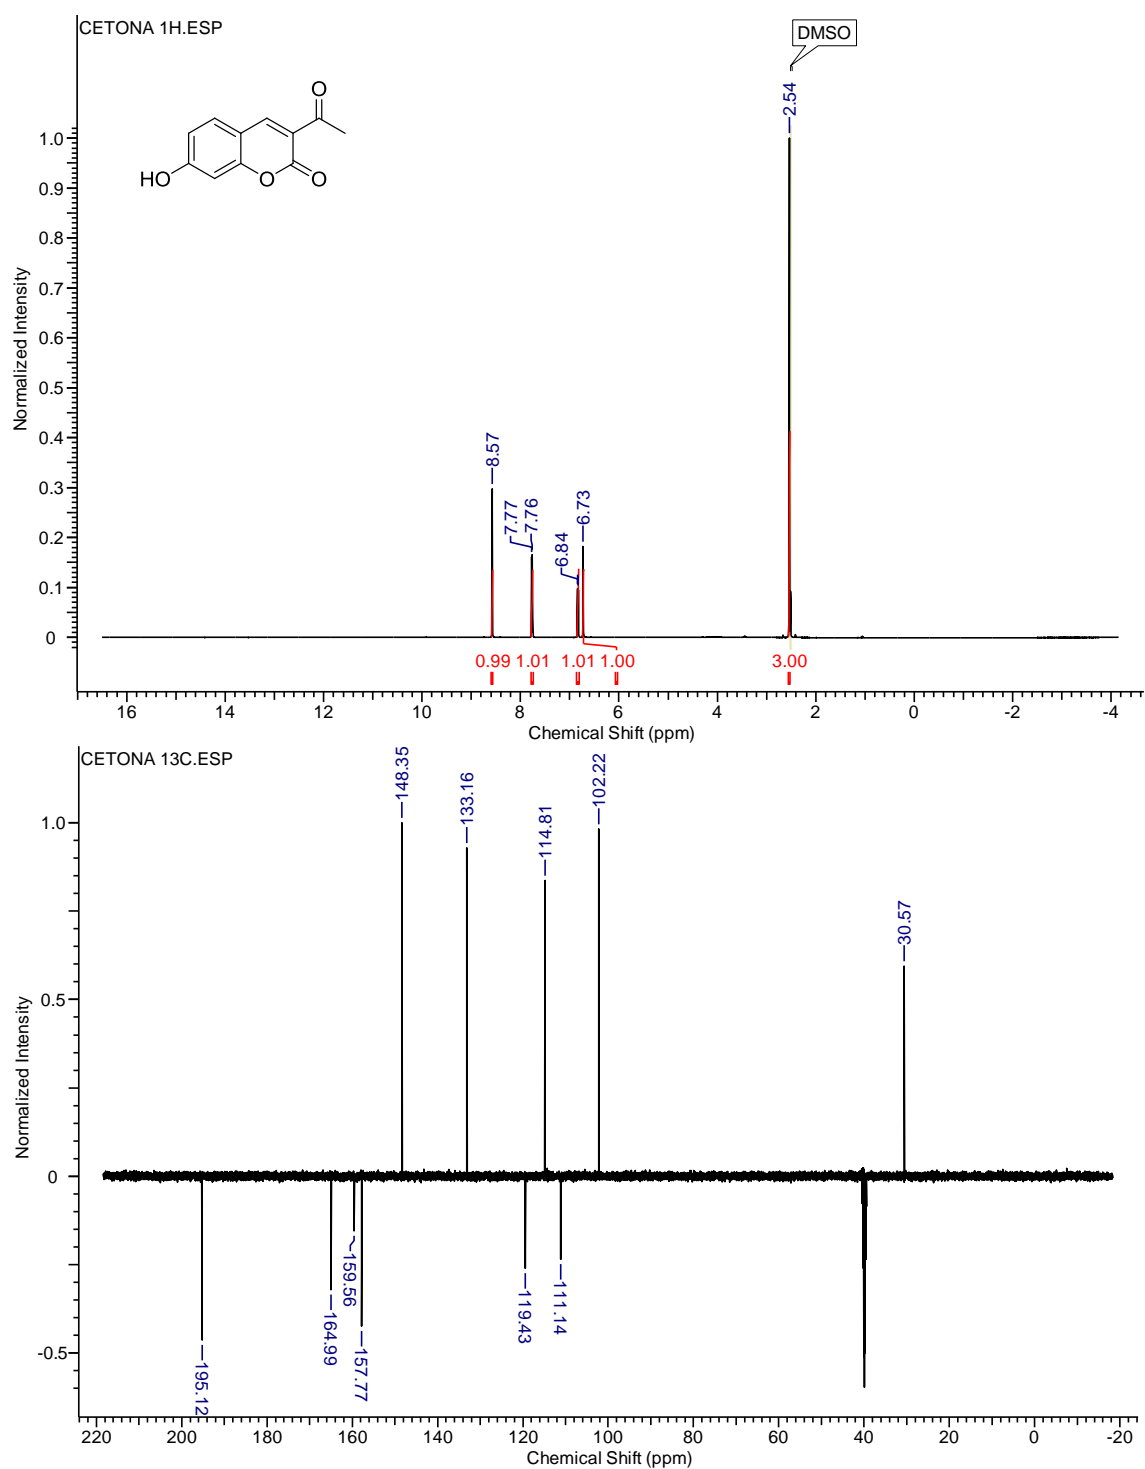

**Fig. S1.**  $^1\text{H}$  NMR (500 MHz),  $^{13}\text{C}$  NMR (125 MHz) spectra of **1** in  $\text{DMSO-}d_6$ .

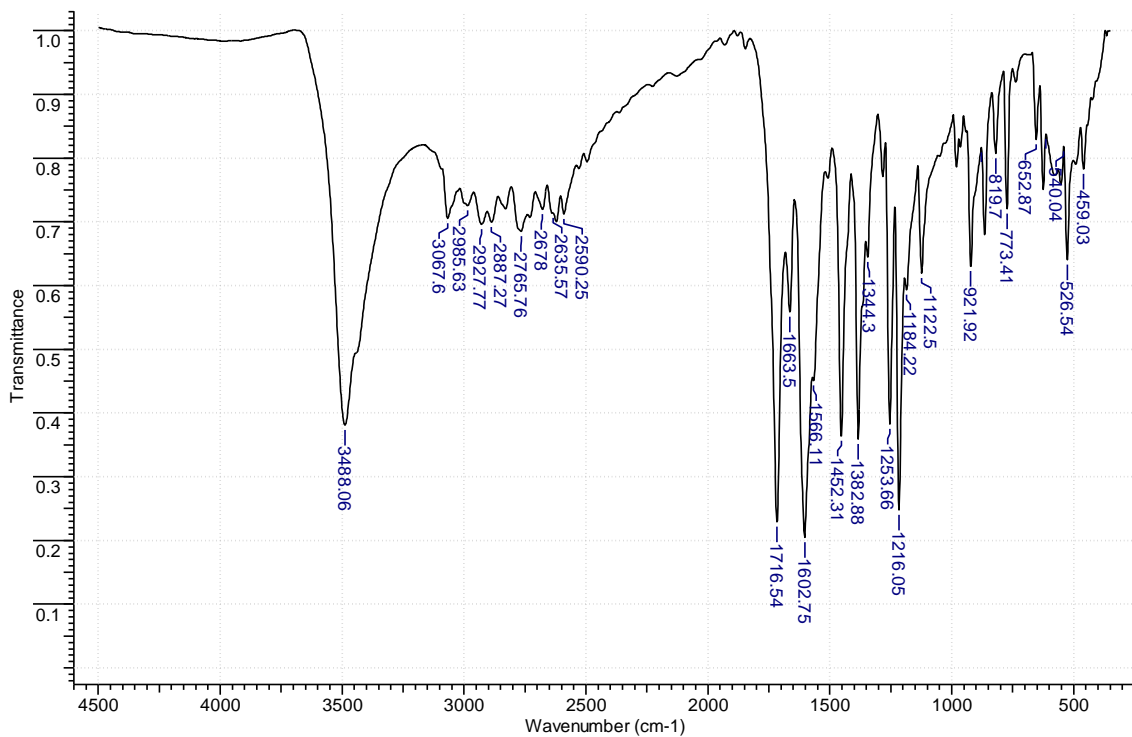

**Fig. S2.** IR spectra of **1** in KBr.

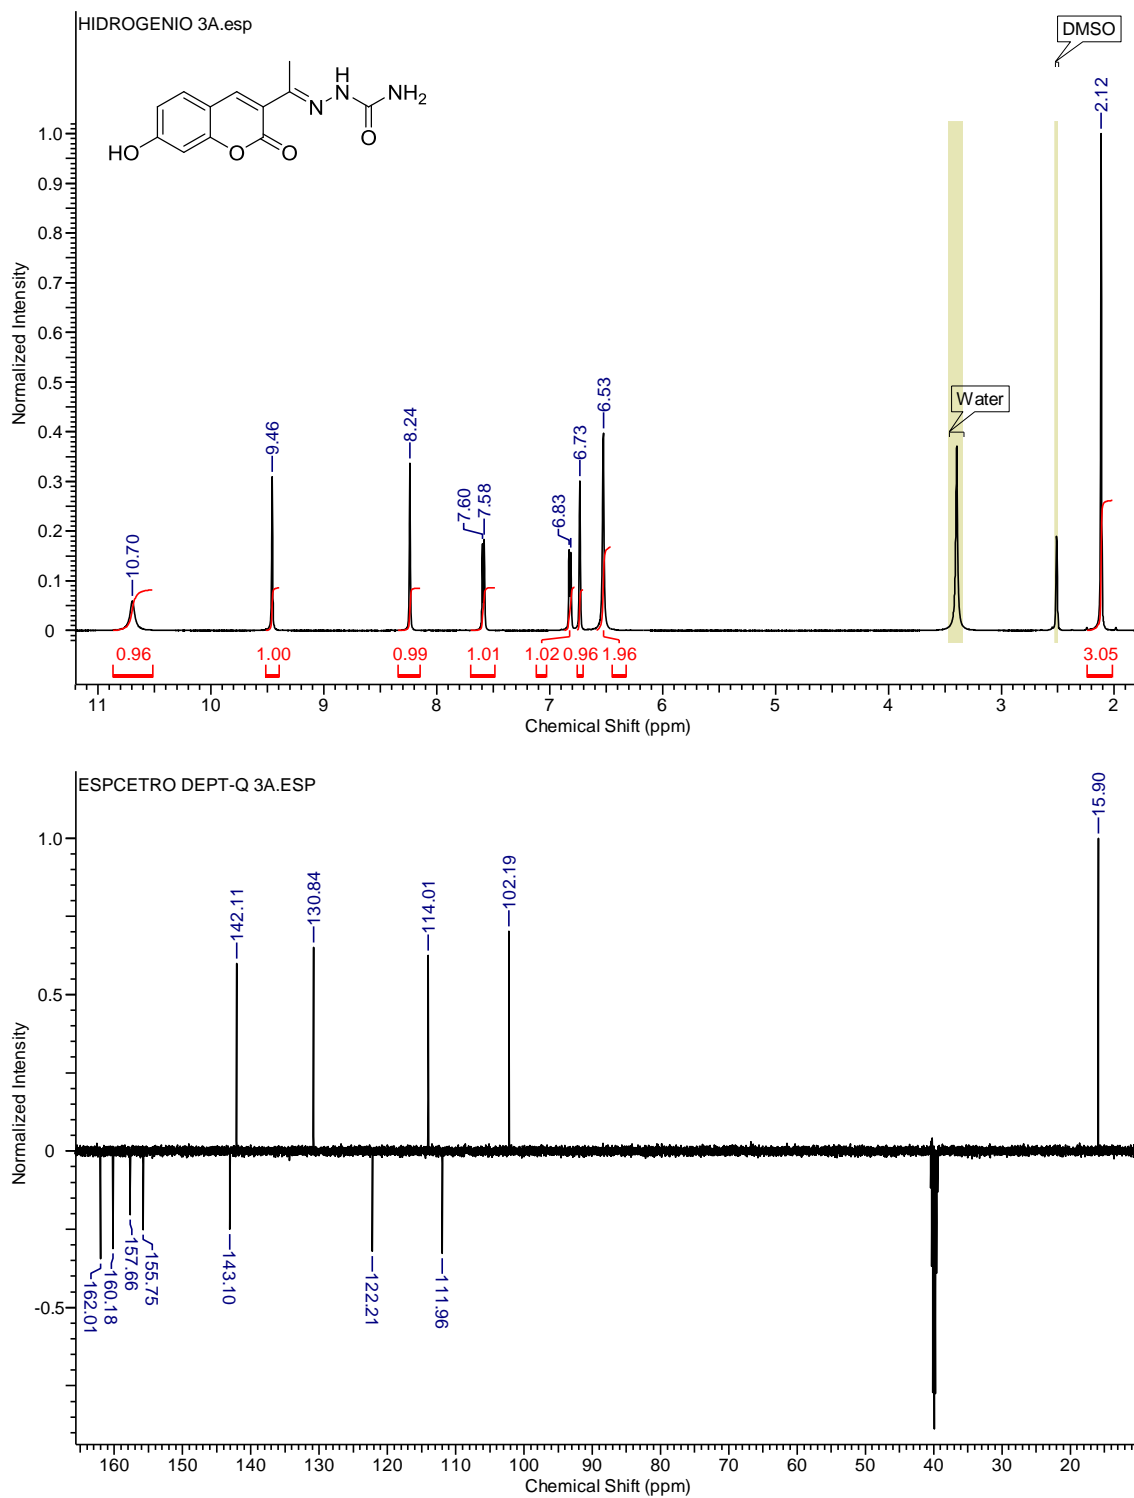

**Fig. S3.**  $^1\text{H}$  NMR (500 MHz),  $^{13}\text{C}$  NMR (125 MHz) spectra of **3a** in  $\text{DMSO-}d_6$ .

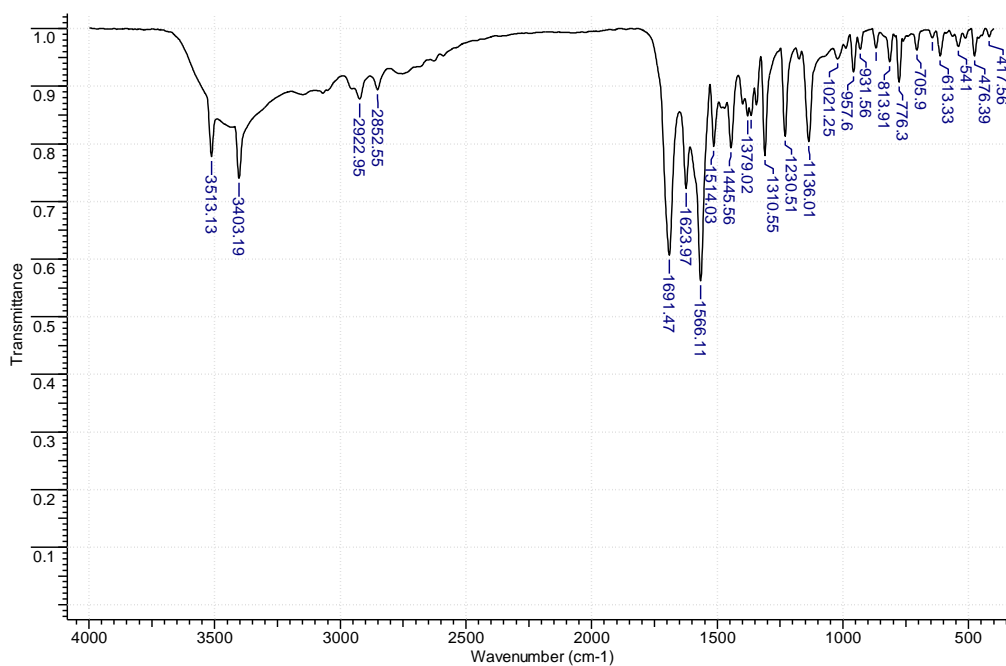

**Fig. S4.** IR spectra of **1** in KBr.

**Acquisition Parameter**

|                   |                     |              |           |                          |         |
|-------------------|---------------------|--------------|-----------|--------------------------|---------|
| Ion Source Type   | ESI                 | Ion Polarity | Negative  | Alternating Ion Polarity | off     |
| Mass Range Mode   | Enhanced Resolution | Scan Begin   | 100 m/z   | Scan End                 | 800 m/z |
| Accumulation Time | 591 $\mu$ s         | RF Level     | 71 %      | Trap Drive               | 51.1    |
| SPS Target Mass   | 500 m/z             | Averages     | 5 Spectra | n/a                      | n/a     |

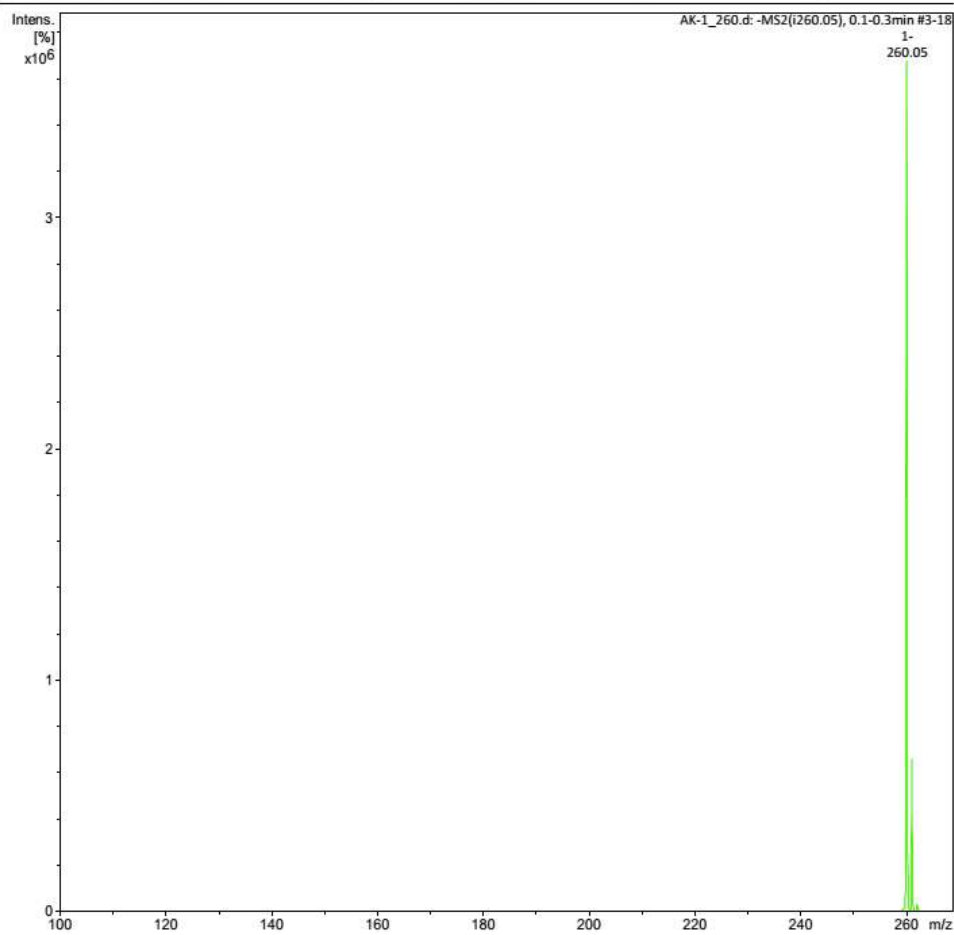

**Fig. S5.** EM spectra of **3a**.

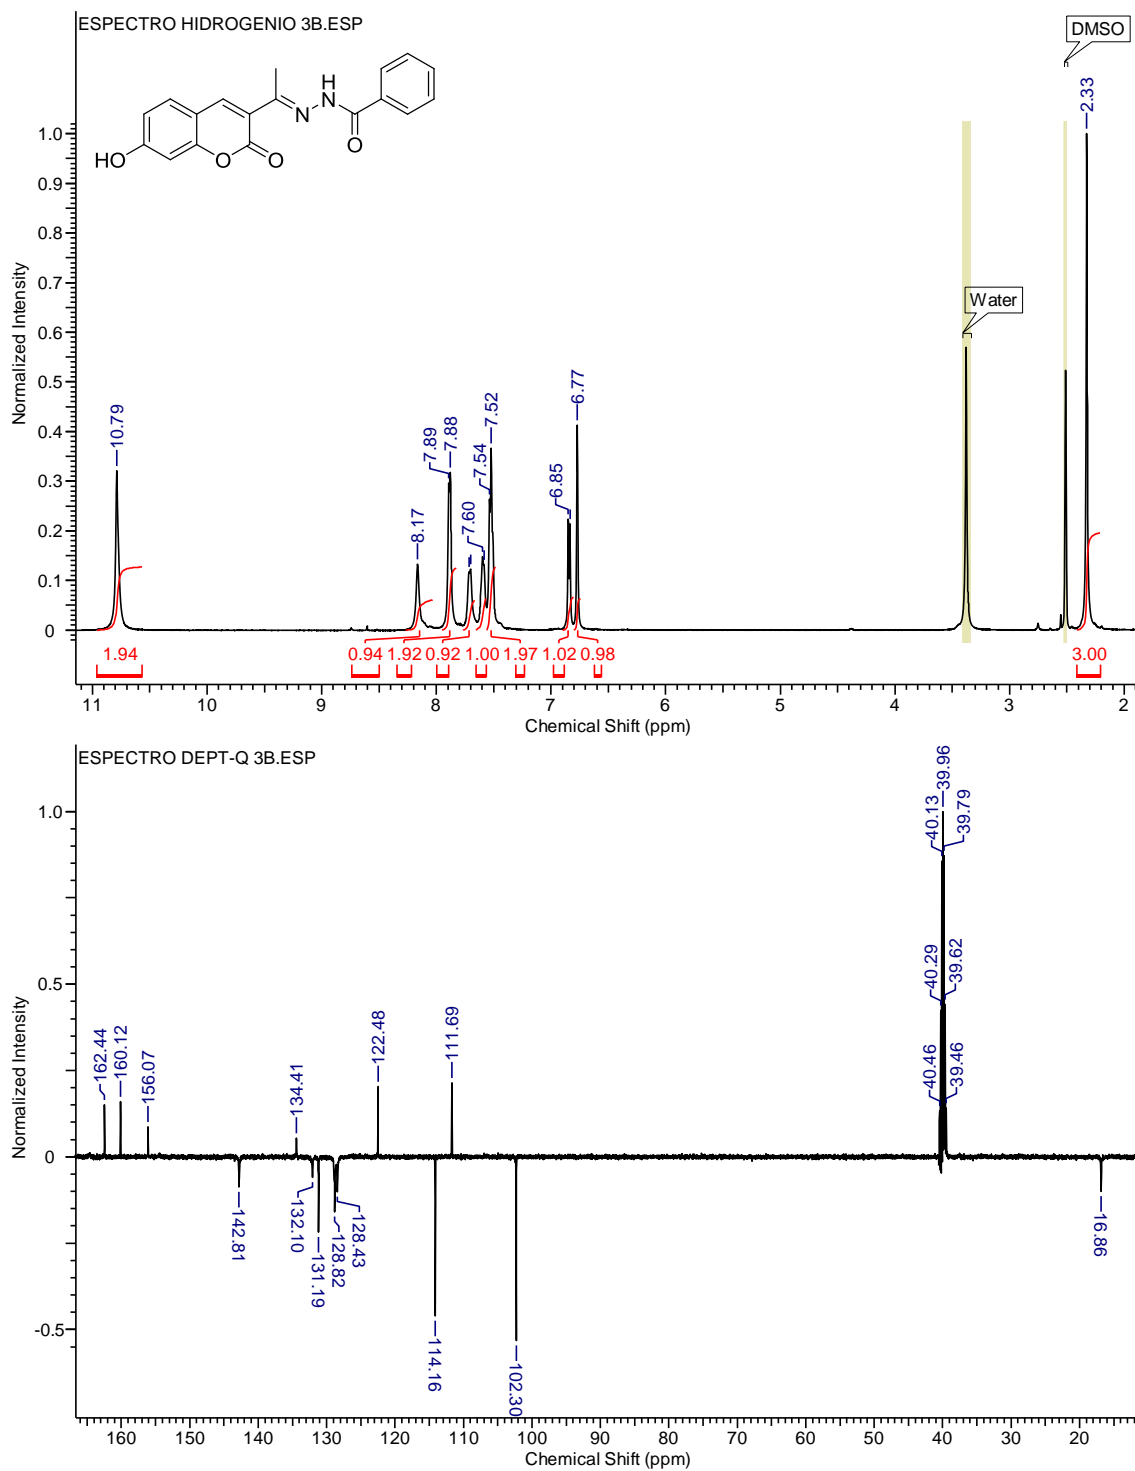

**Fig. S6.**  $^1\text{H}$  NMR (500 MHz),  $^{13}\text{C}$  NMR (125 MHz) spectra of **3b** in  $\text{DMSO-}d_6$ .

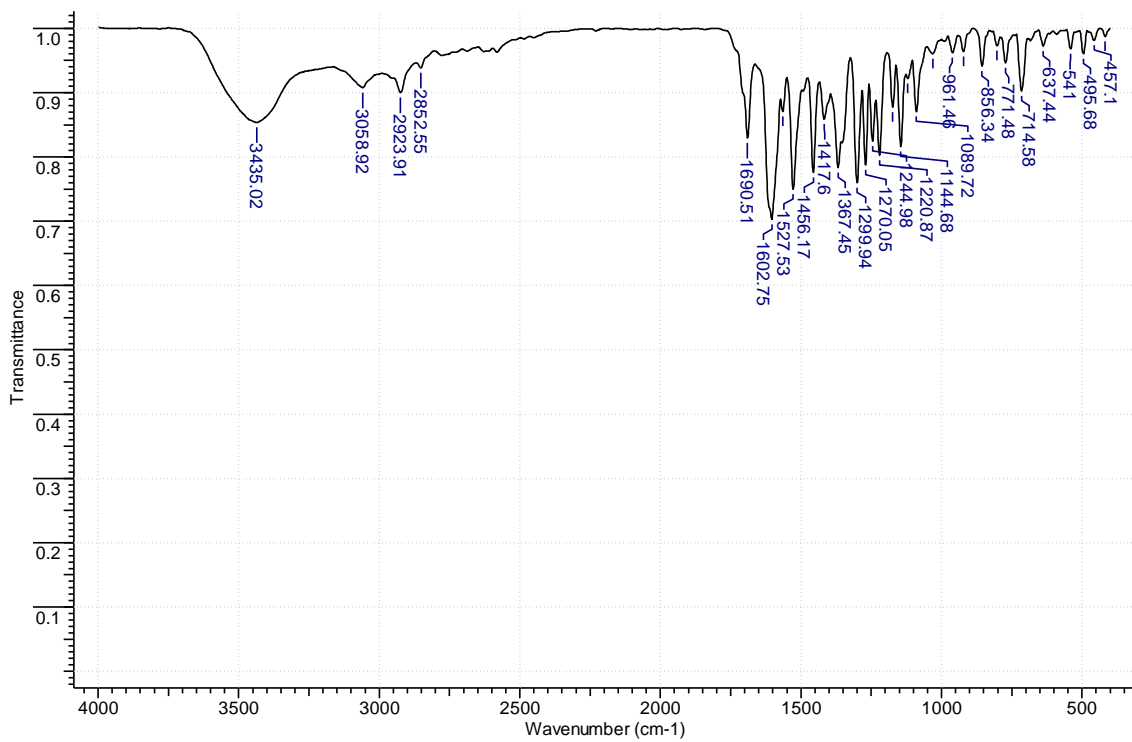

**Fig. S7.** IR spectra of **3b** in KBr.

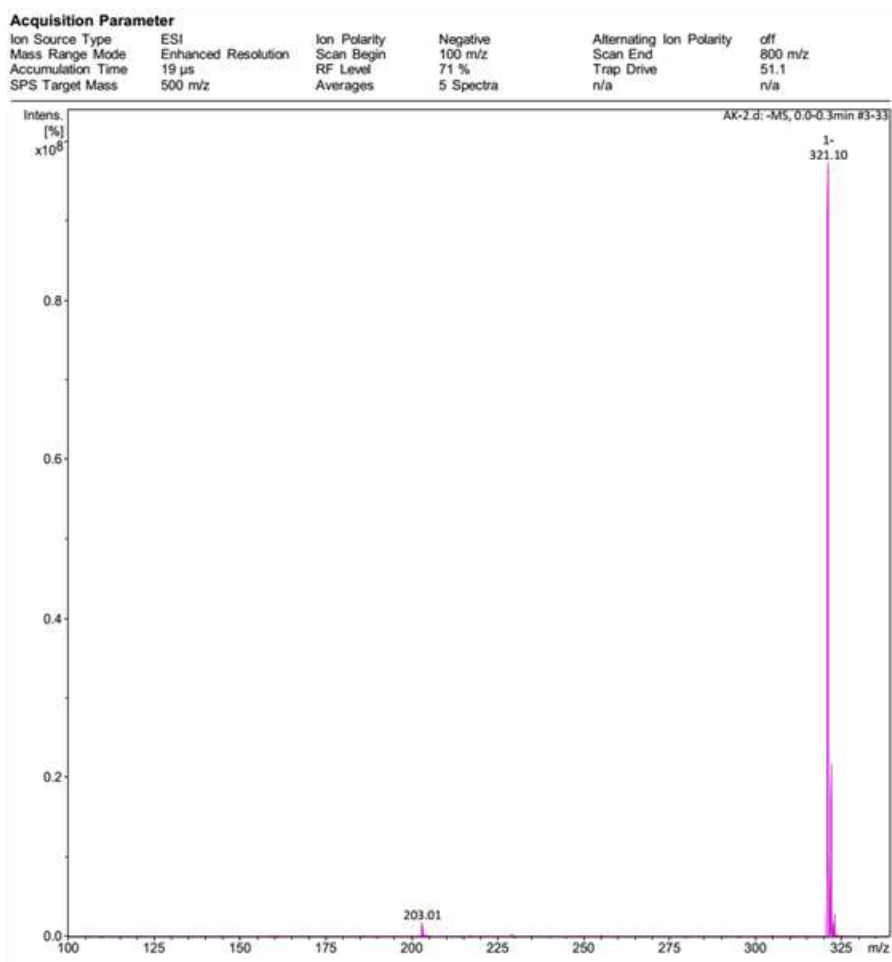

**Fig. S8.** EM spectra of **3b**.

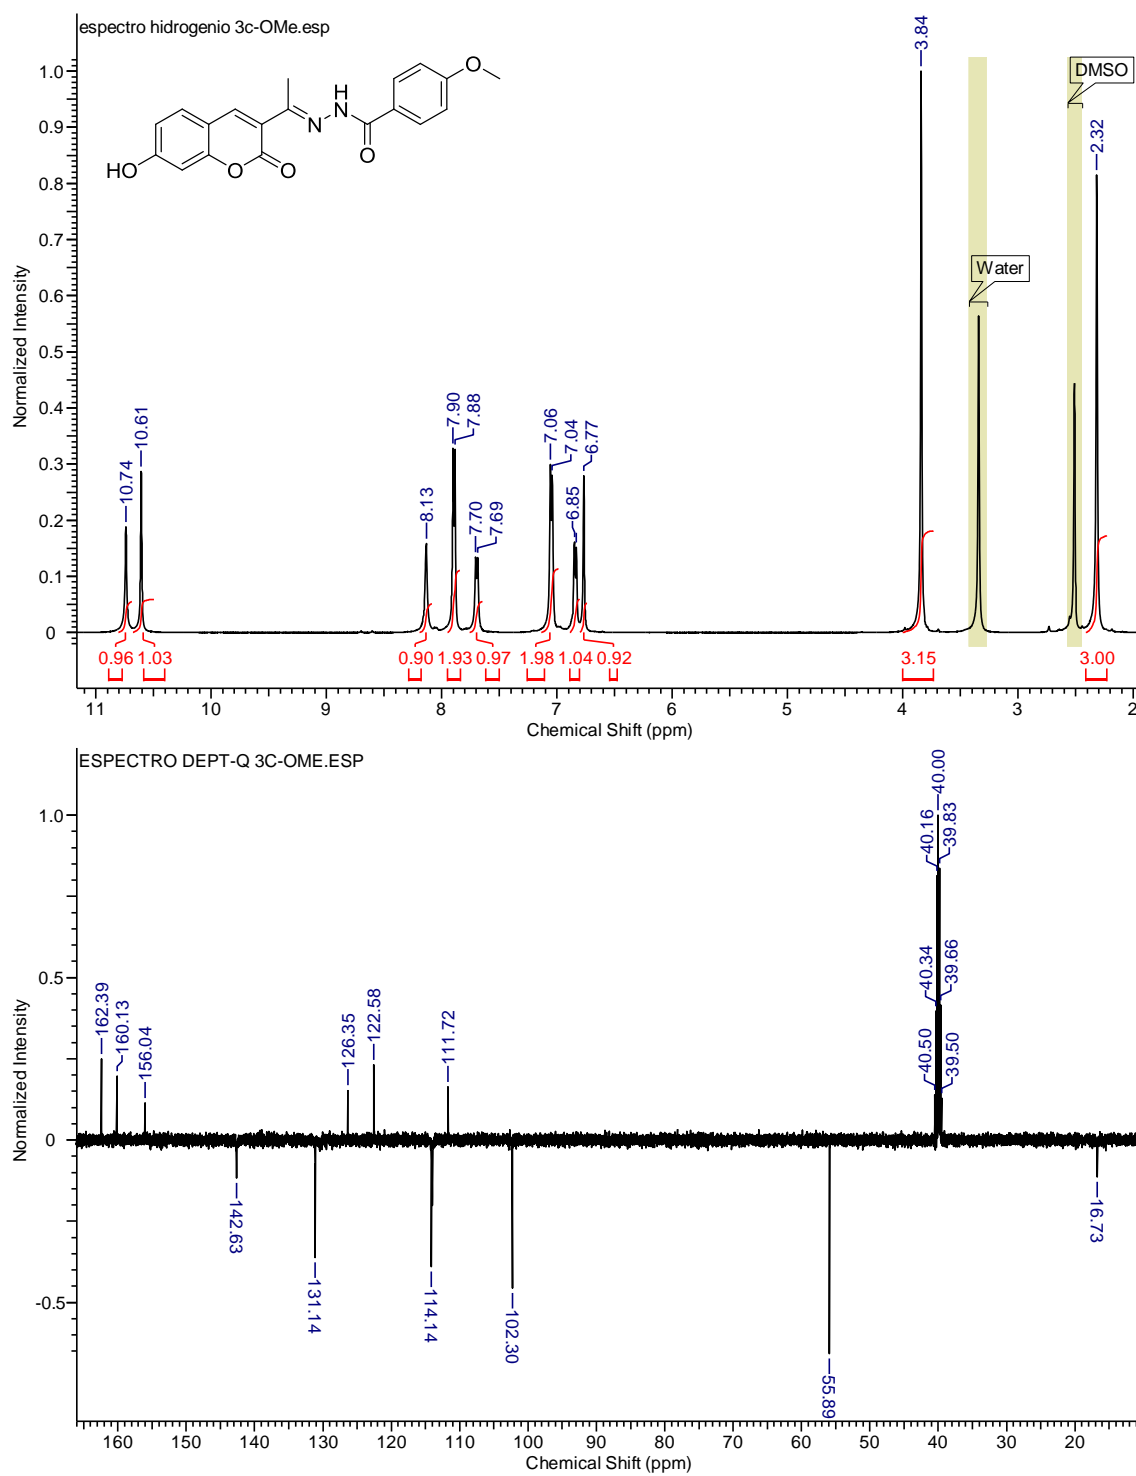



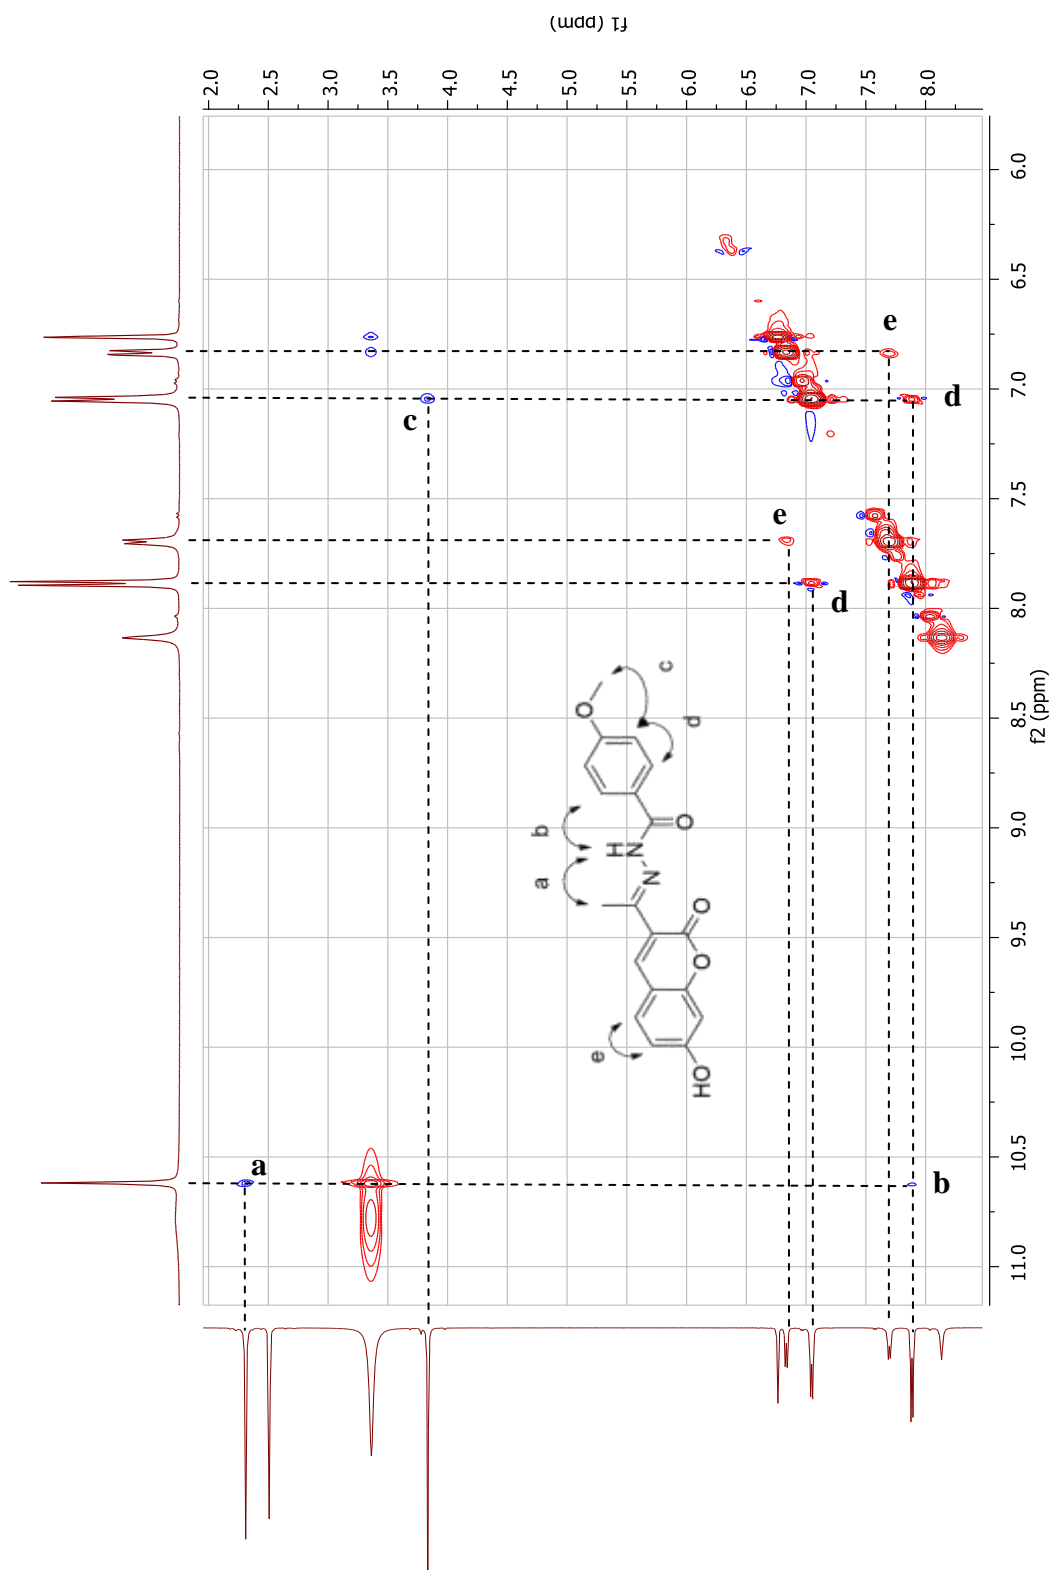

**Fig. S10.** NOESY spectrum of **3c** in DMSO- $d_6$  and correlations indicating the (*E*)-isomer.

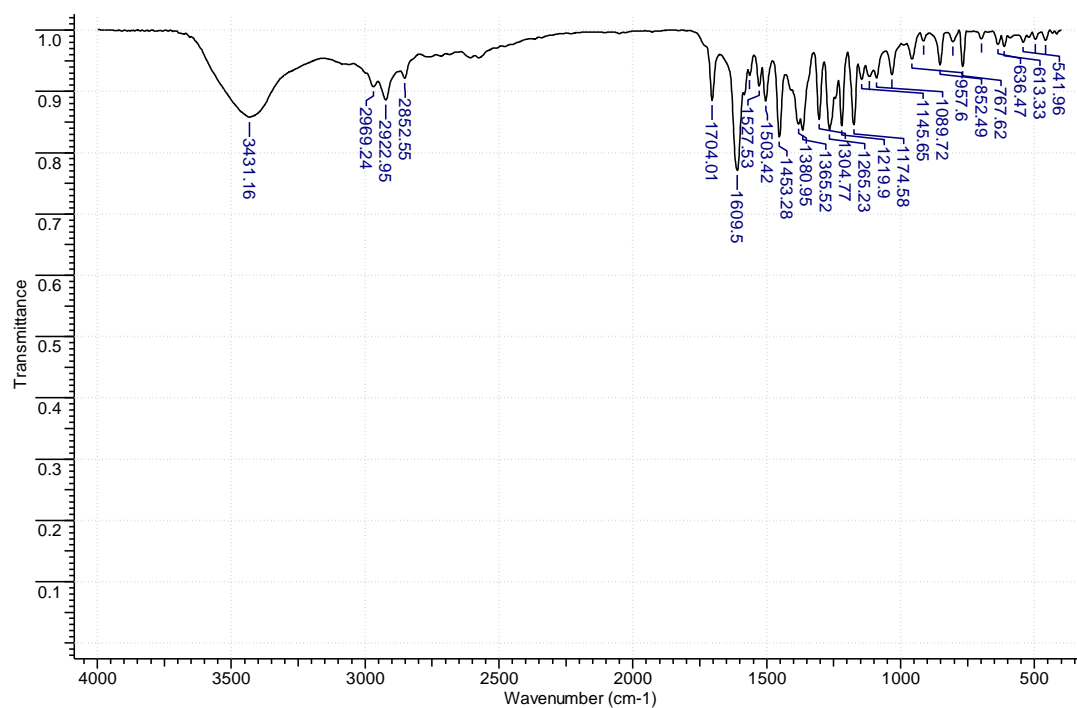

Fig. S11. IR spectra of **3c** in KBr.

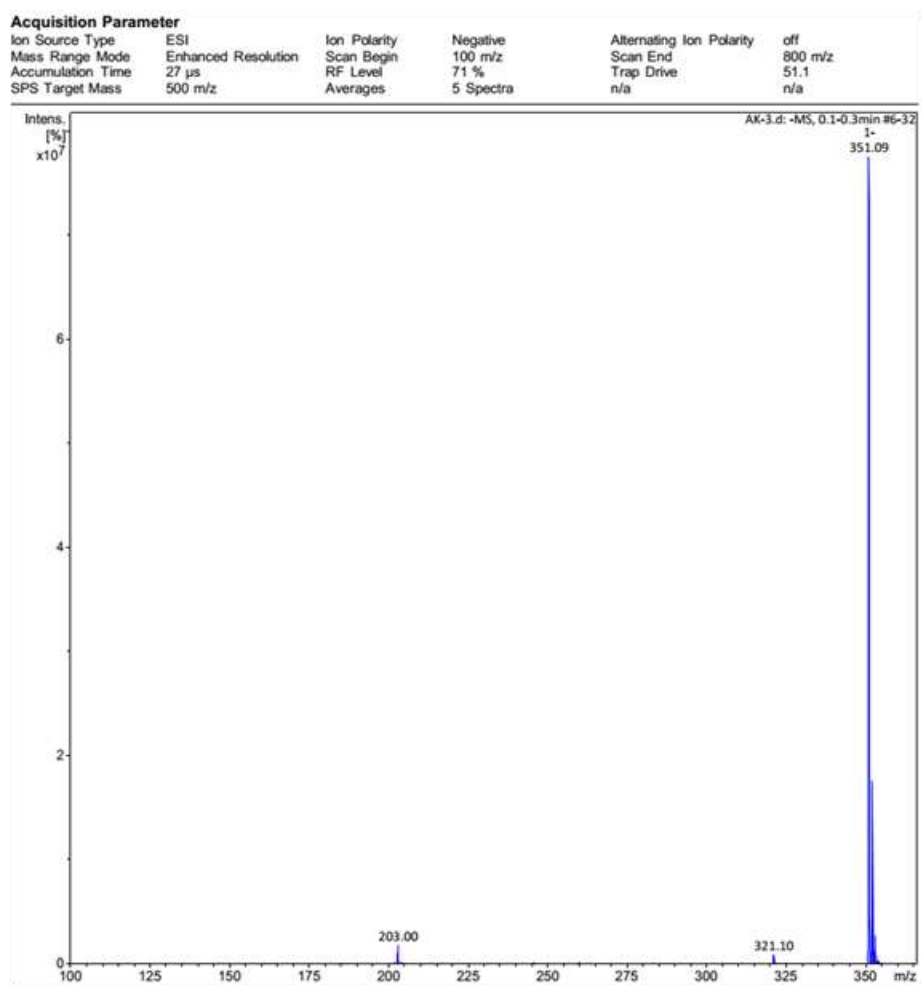

Fig. S12. EM spectra of **3c**.

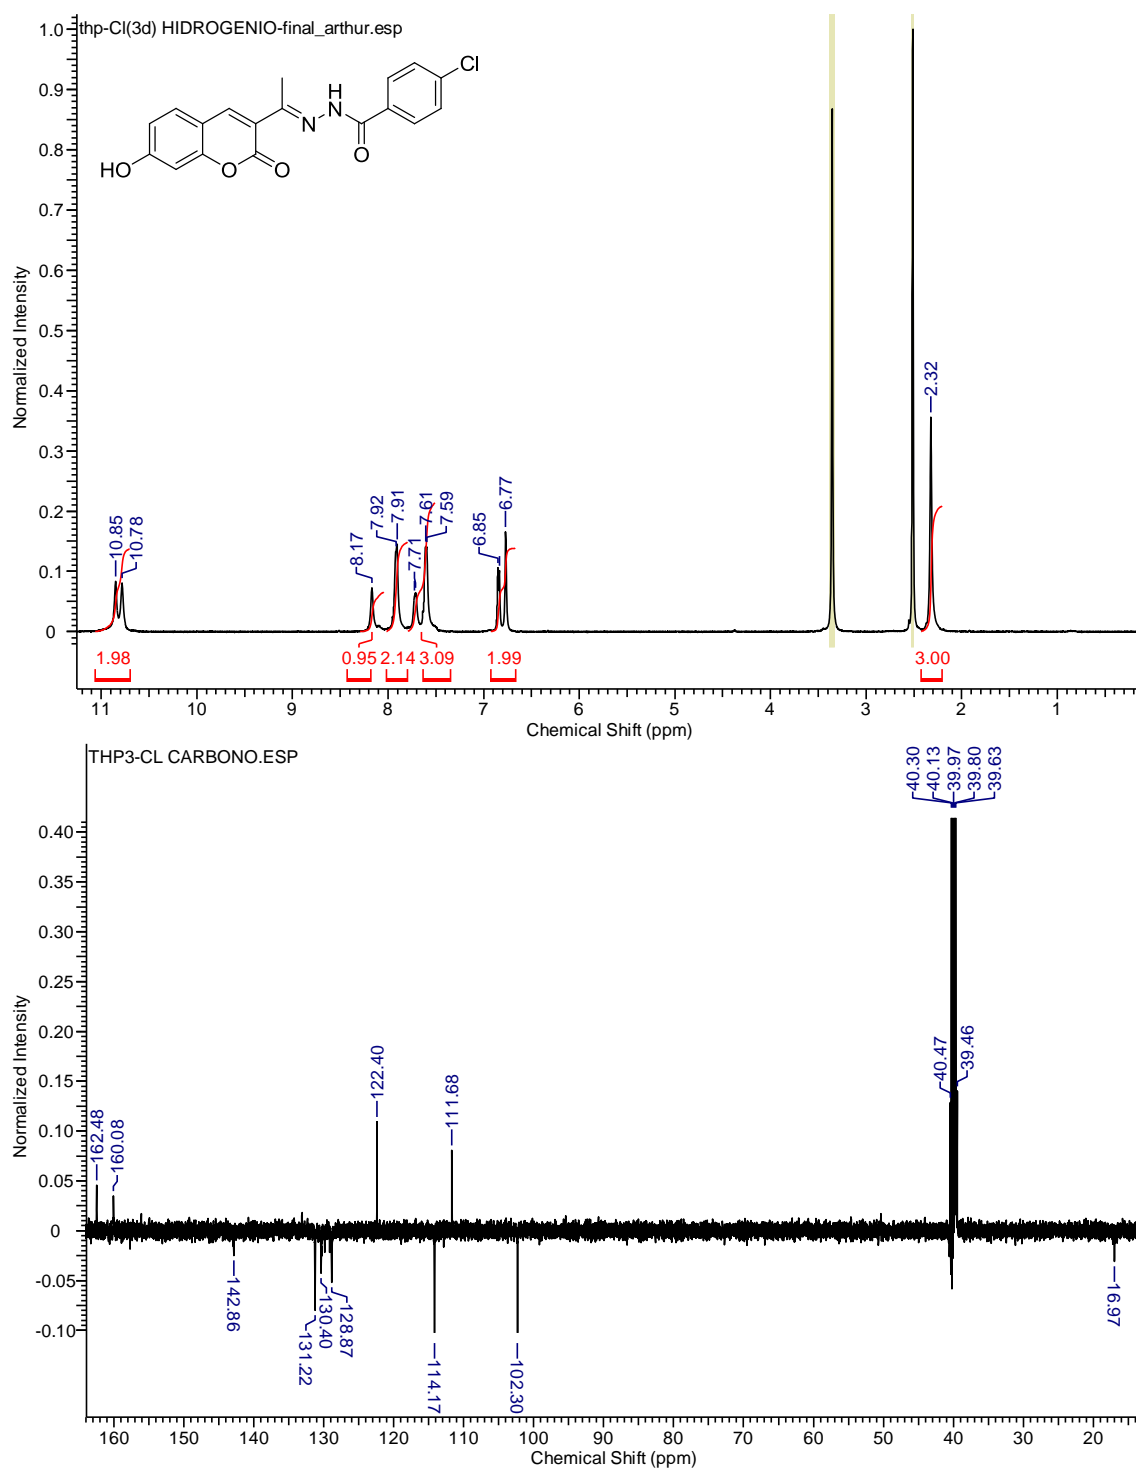

**Fig. S13.**  $^1\text{H}$  NMR (500 MHz),  $^{13}\text{C}$  NMR (125 MHz) spectra of **3d** in  $\text{DMSO-}d_6$ .

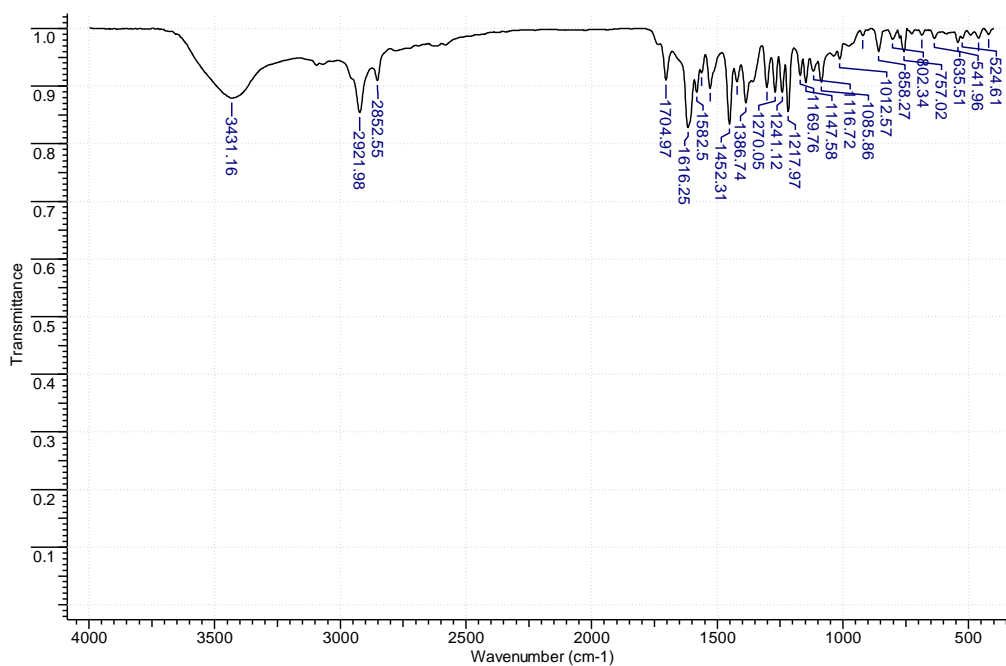

**Fig. S14.** IR spectra of **3d** in KBr.

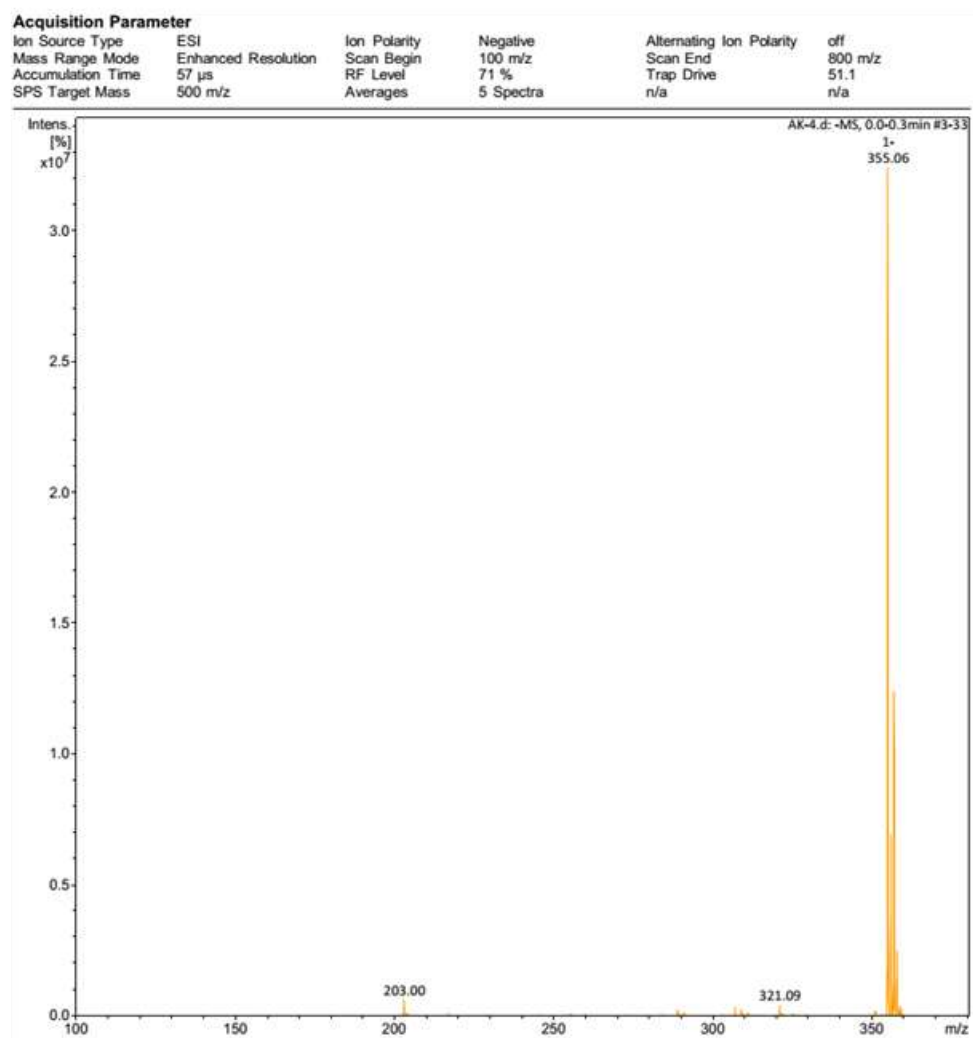

**Fig. S15.** EM spectra of **3d**.

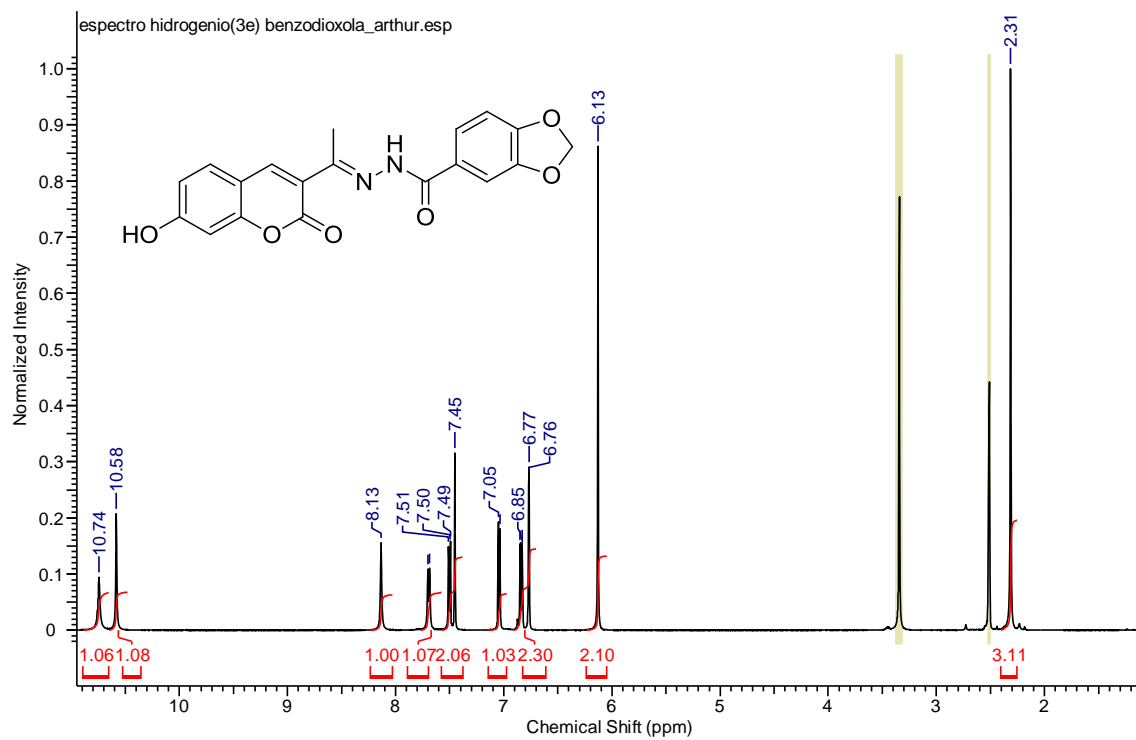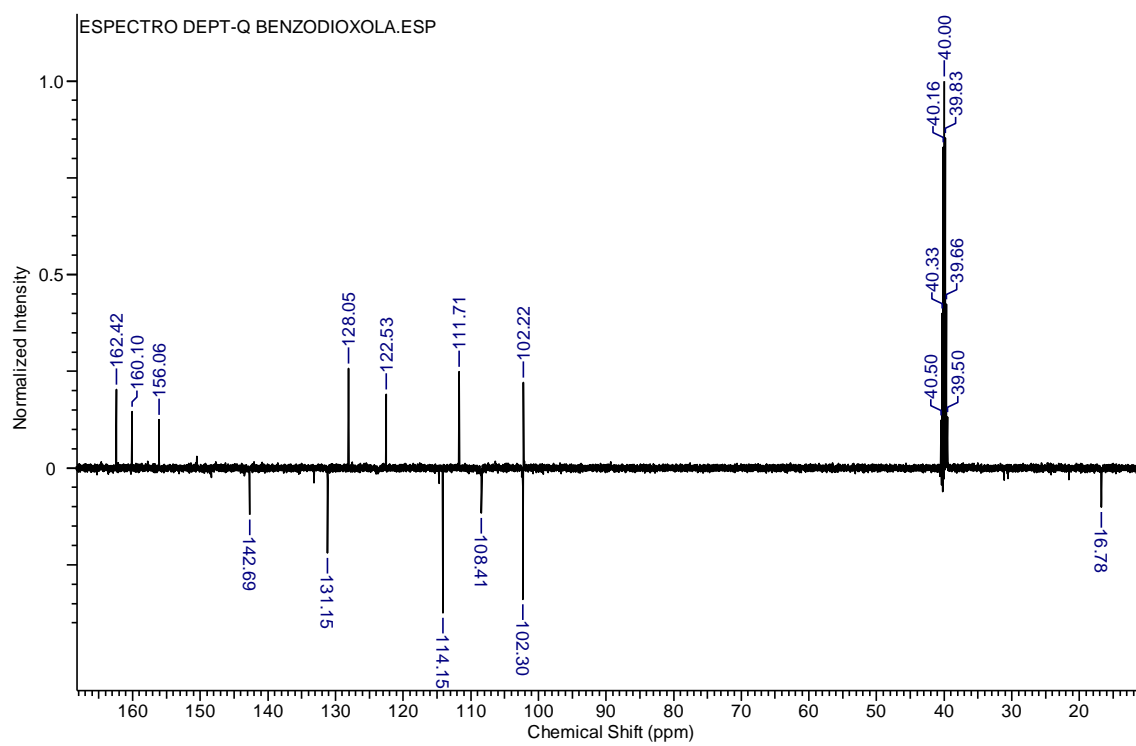

**Fig. S16.**  $^1\text{H}$  NMR (500 MHz),  $^{13}\text{C}$  NMR (125 MHz) spectra of **3e** in  $\text{DMSO-}d_6$ .

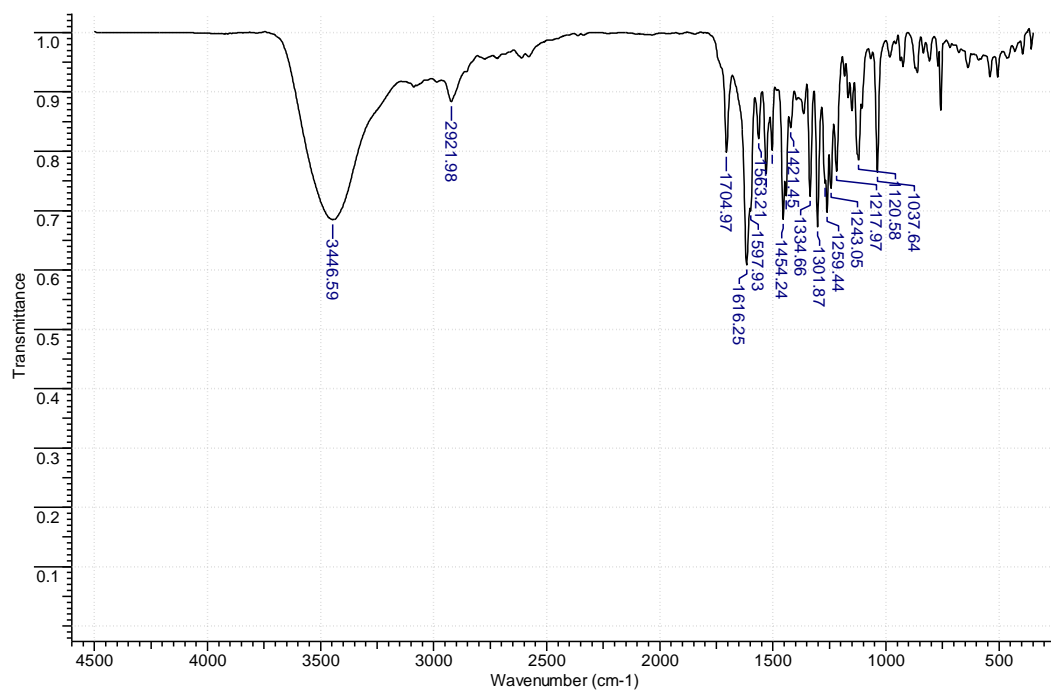

**Fig. S17.** IR spectra of **3e** in KBr.

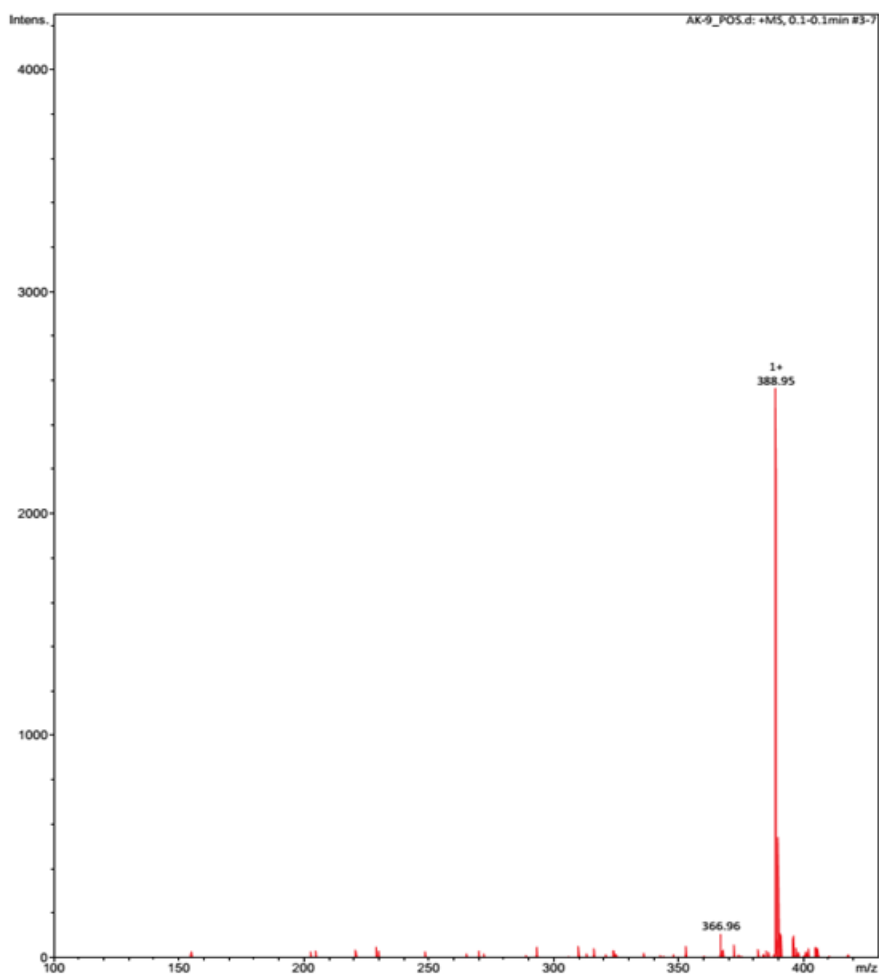

**Fig. S18.** EM spectra of **3e**.

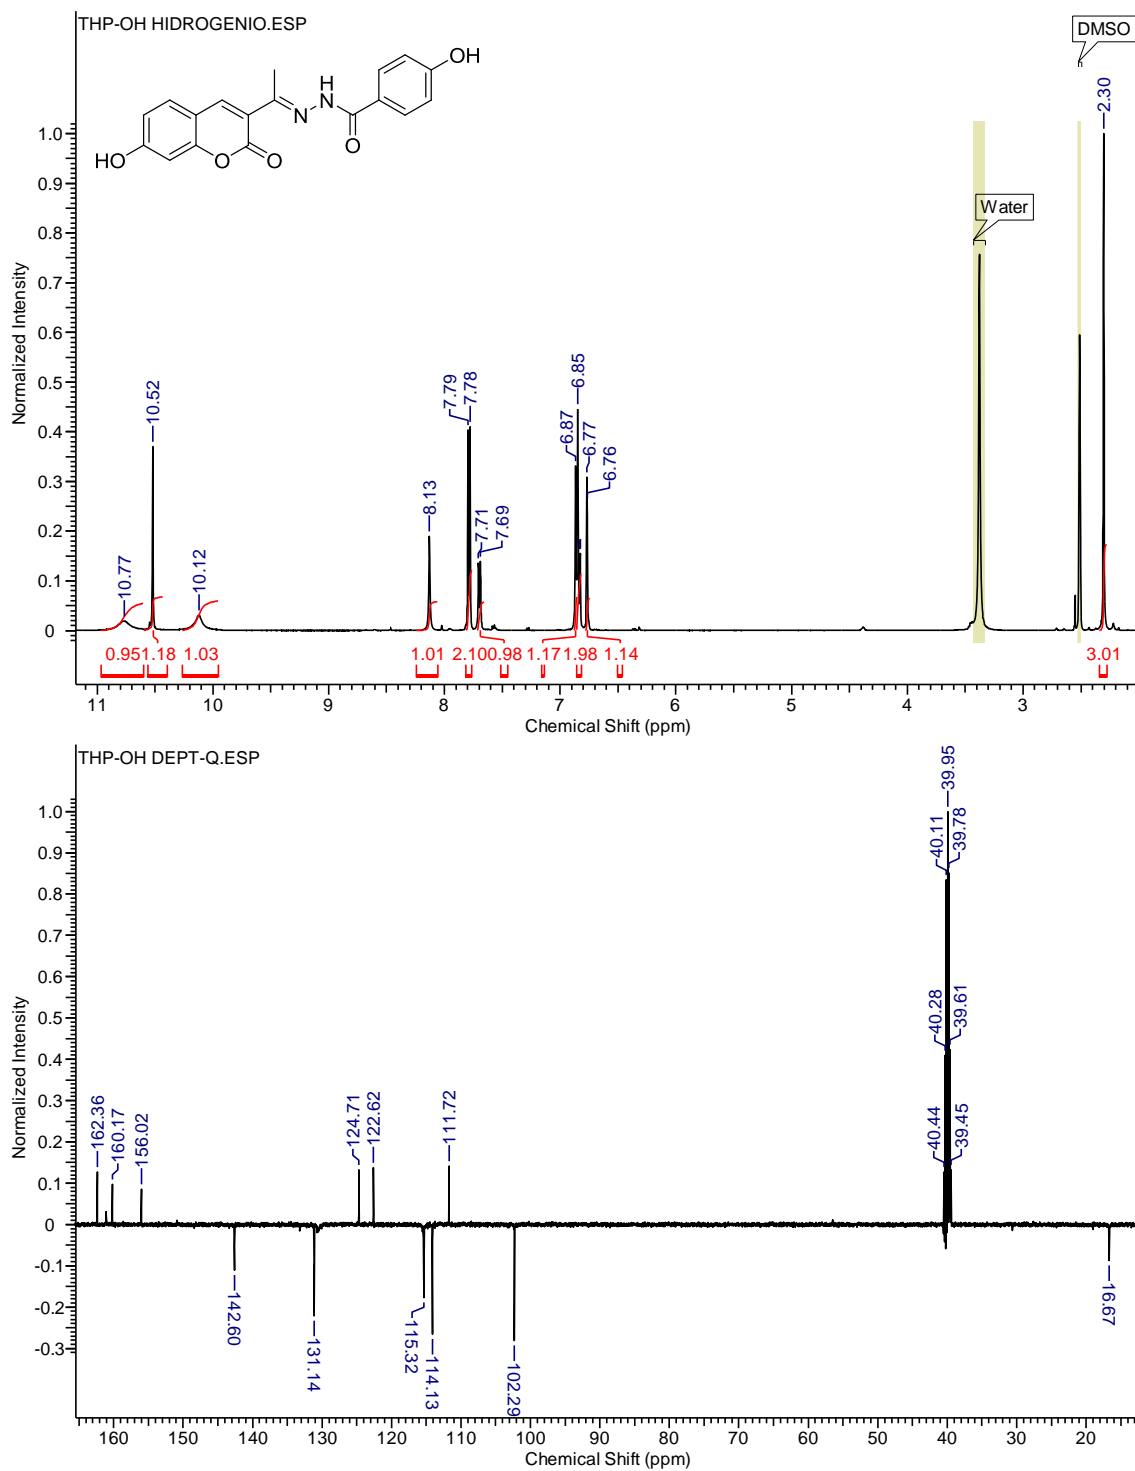

**Fig. S19.**  $^1\text{H}$  NMR (500 MHz),  $^{13}\text{C}$  NMR (125 MHz) spectra of **3f** in  $\text{DMSO-}d_6$ .

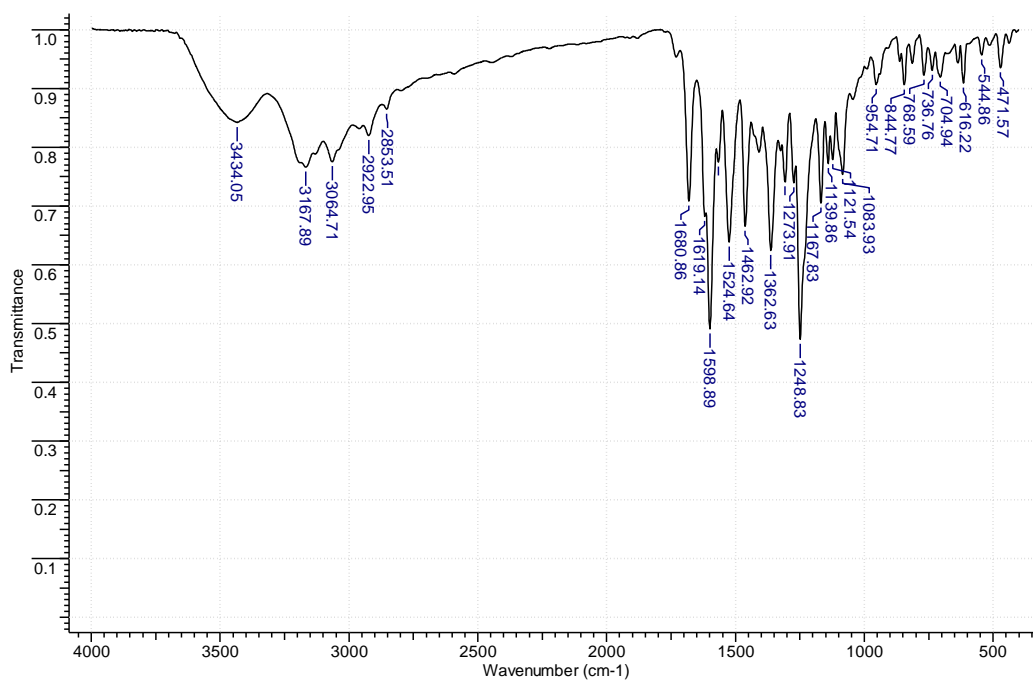

Fig. S20. IR spectra of 3f in KBr.

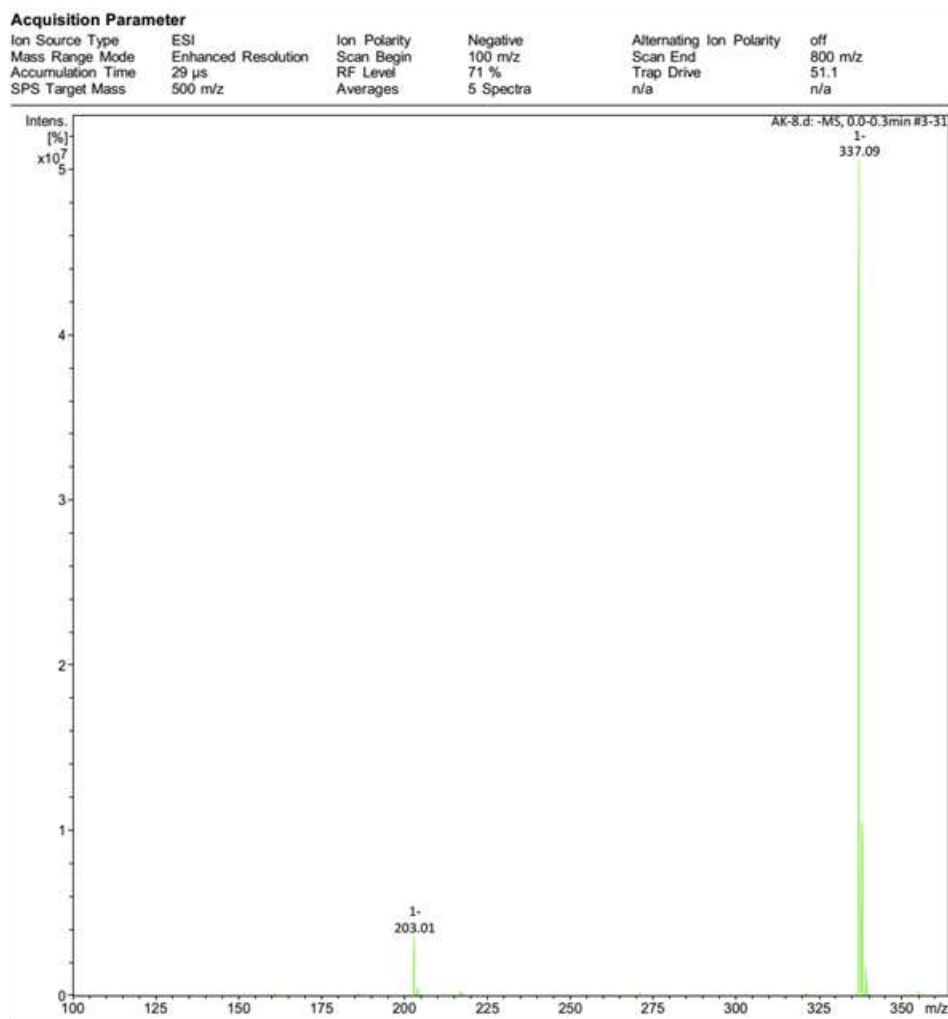

Fig. S21. EM spectra of 3f.



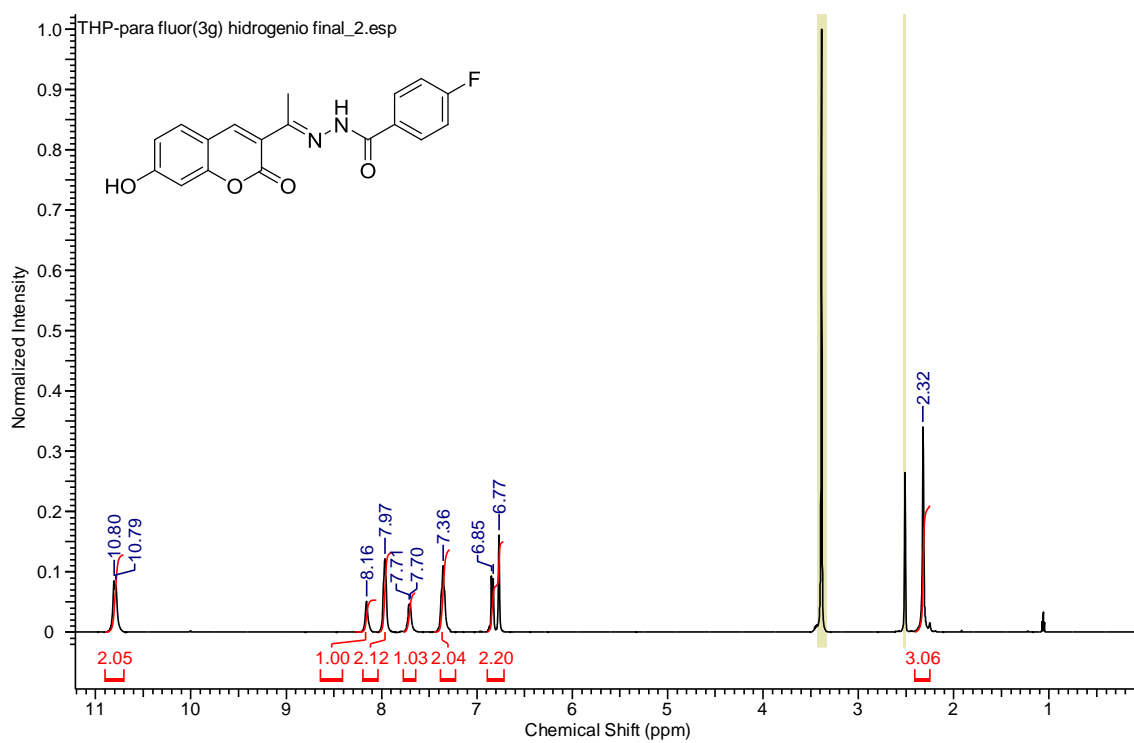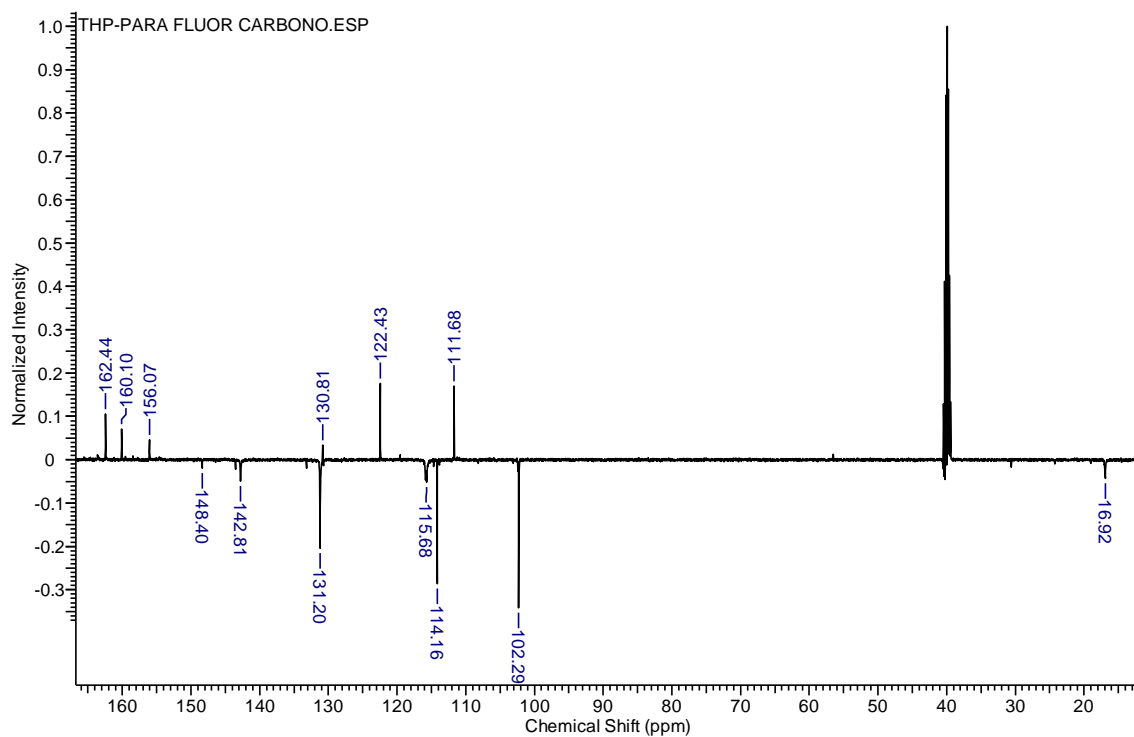

**Fig. S22.**  $^1\text{H}$  NMR (500 MHz),  $^{13}\text{C}$  NMR (125 MHz) spectra of **3g** in  $\text{DMSO-}d_6$ .

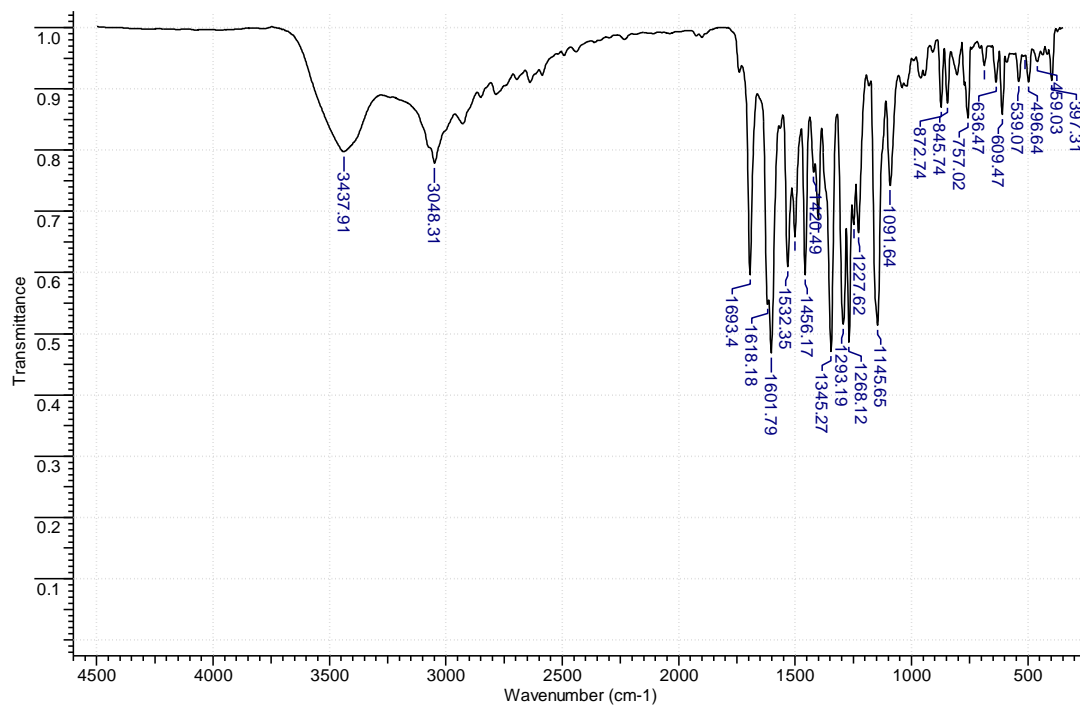

Fig. S23. IR spectra of 3g in KBr.

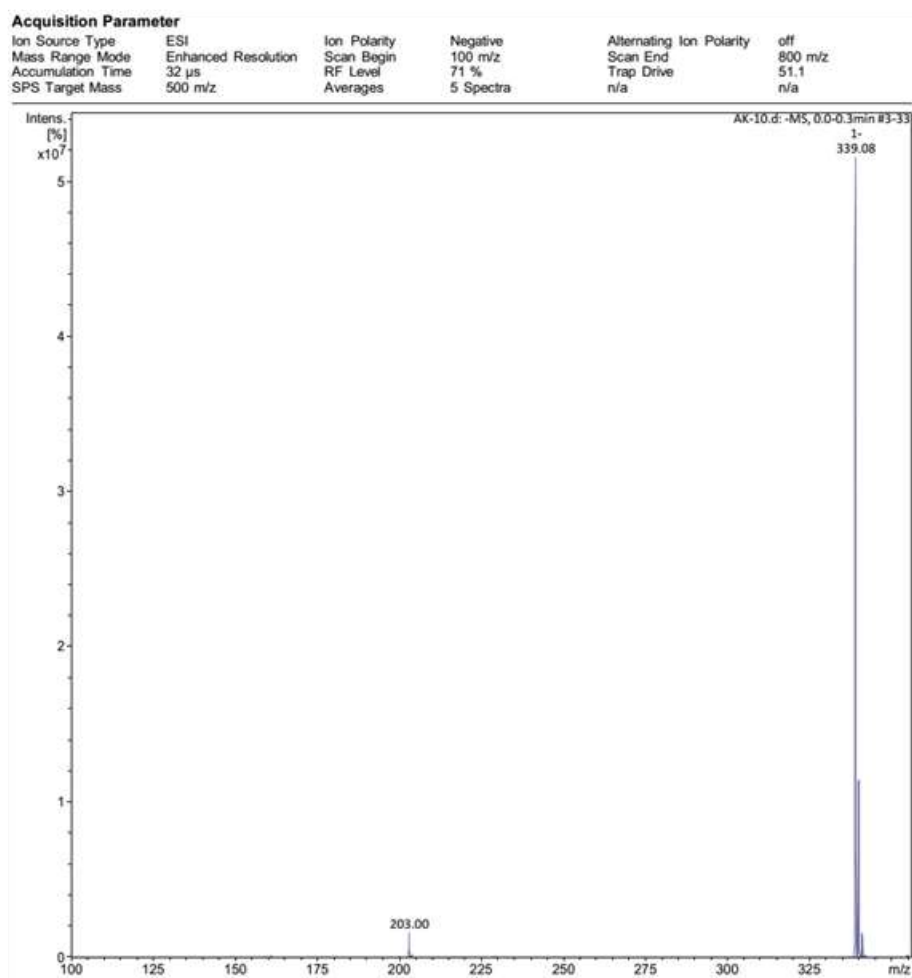

Fig. S24. EM spectra of 3g.

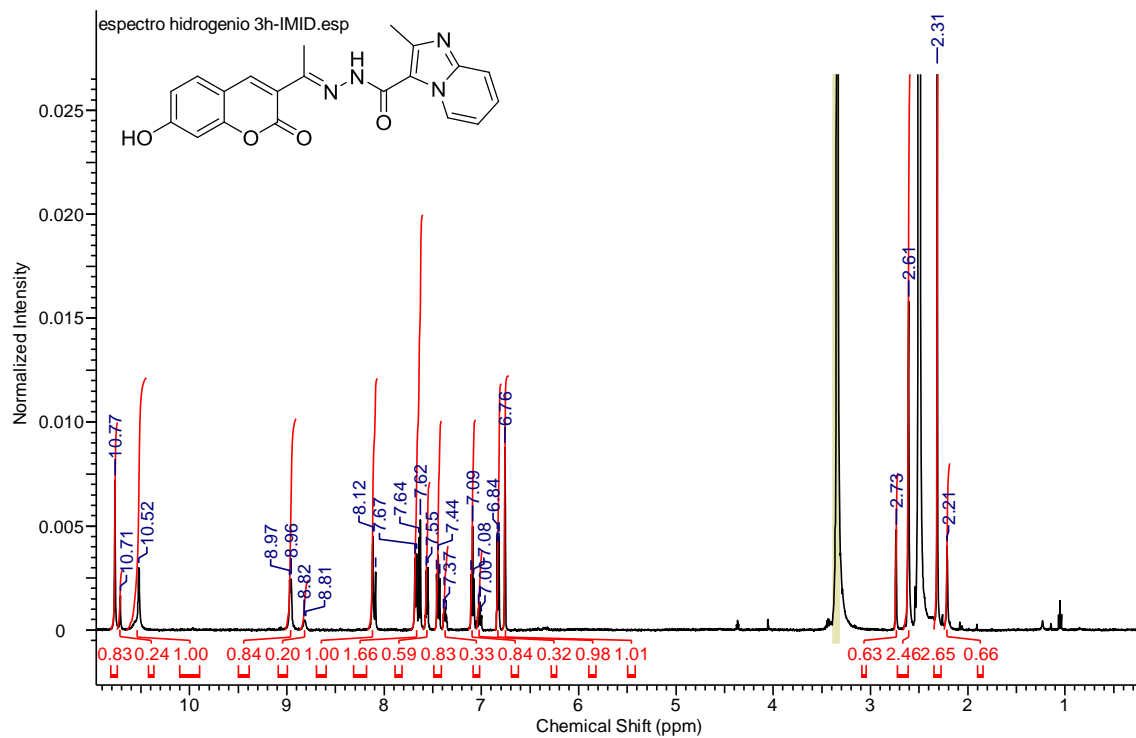

**Fig. S25.**  $^1\text{H}$  NMR (500 MHz), spectra of **3h** in  $\text{DMSO-}d_6$ .

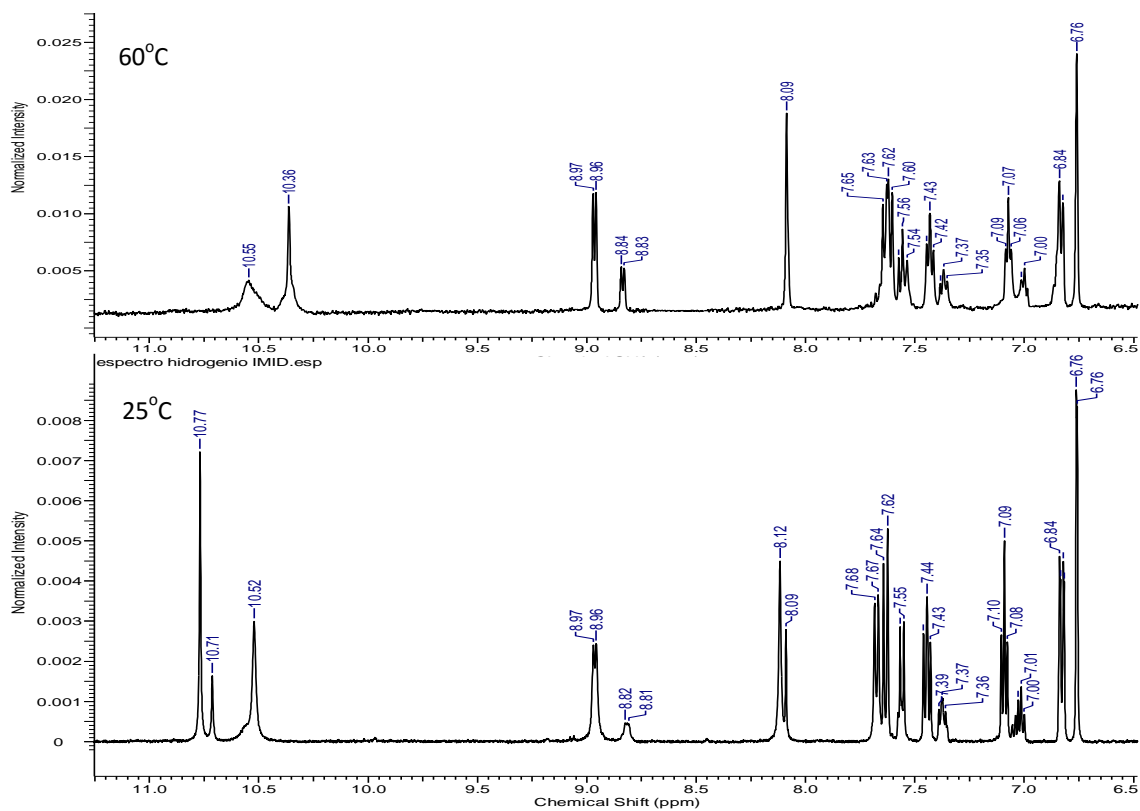

**Fig. S26.**  $^1\text{H}$  NMR, expanded aromatic region of **3h** in  $\text{DMSO-}d_6$  at 25 and 60°C.

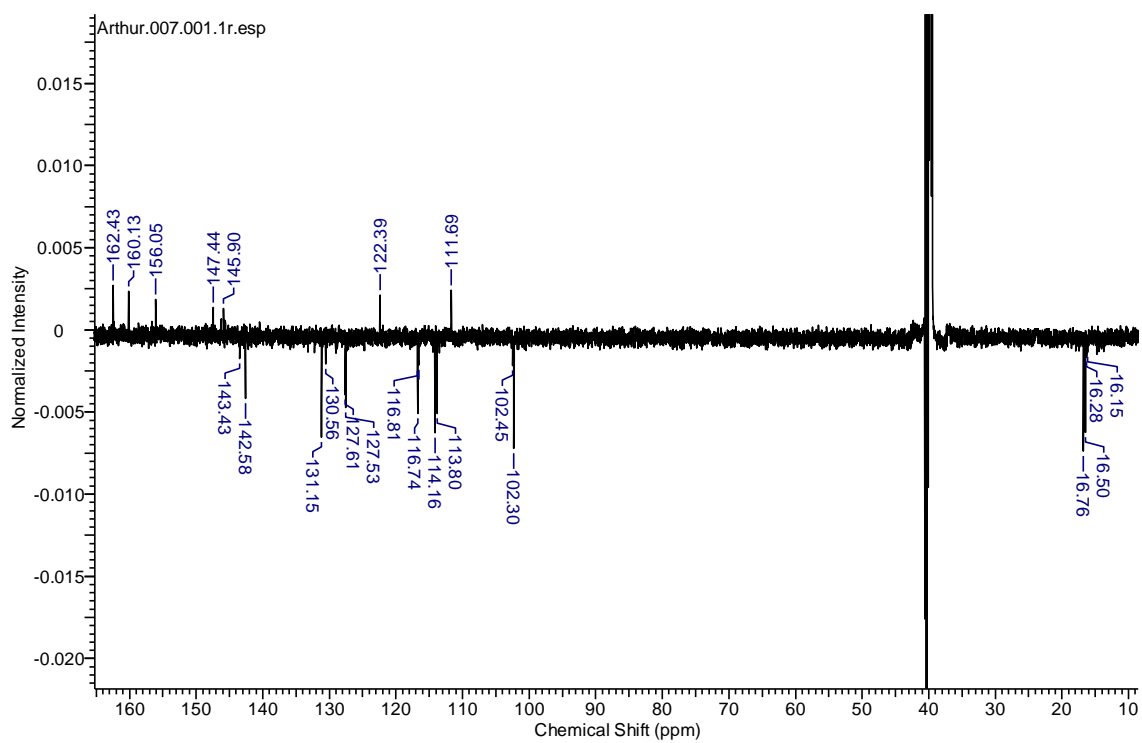

**Fig. S27.**  $^{13}\text{C}$  NMR (125 MHz) spectrum of **3h** in  $\text{DMSO-}d_6$  (poor quality due to low solubility).

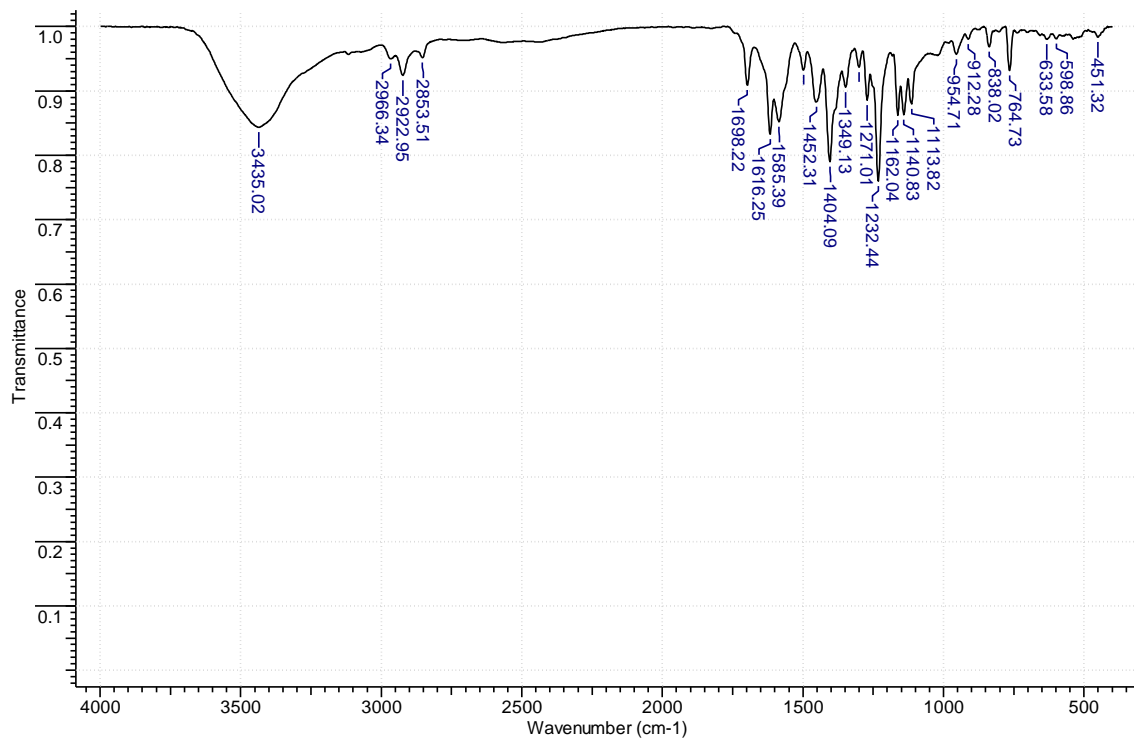

**Fig. S28.** IR spectra of **3h** in KBr.

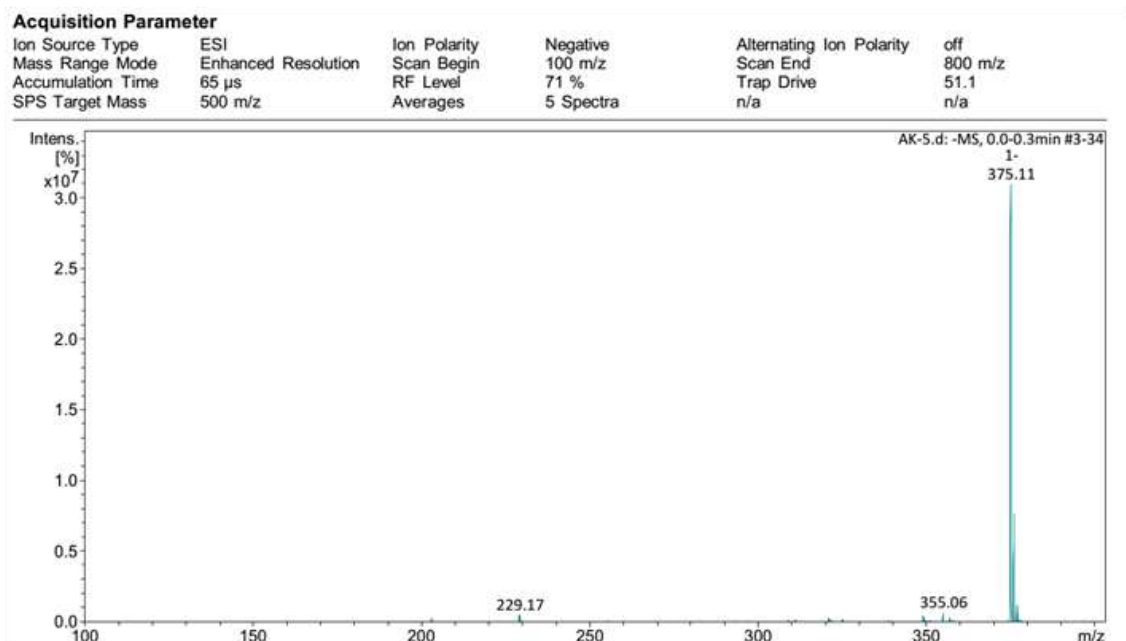

Fig. S29. EM spectra of 3h.

==== Shimadzu LCsolution Analysis Report ====

C:\LabSolutions\1D\dados HPLC\Marina\2016\Marco\AK-5.lcd

Acquired by : Admin  
 Sample Name : AK-5  
 Sample ID :  
 Tray# : 1  
 Vial # : 64  
 Injection Volume : 40  $\mu$ L  
 Data File Name : AK-5.lcd  
 Method File Name : MET\_60ACN\_40AGUA\_T10.lcm  
 Batch File Name : tabela.lcb  
 Report File Name : Default.lcr  
 Data Acquired : 3/4/2016 12:11:43 PM  
 Data Processed : 4/26/2016 4:56:10 PM

<Chromatogram>

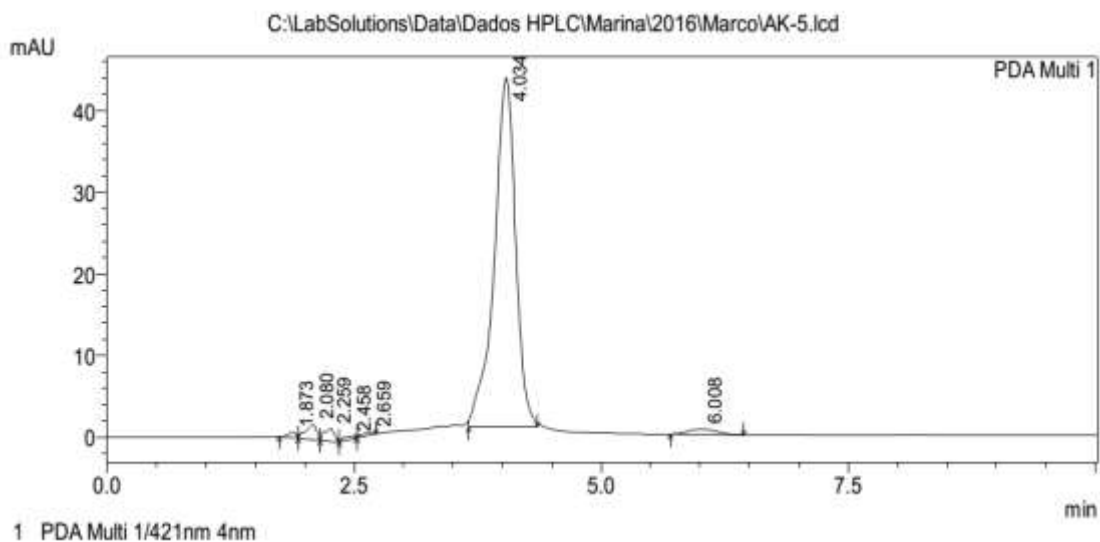

Fig. S30. RP-HPLC analysis of 3h.

### pKa determination:

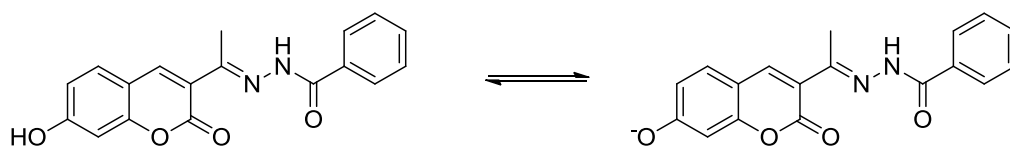

The spectral change from pH 5 to pH 8 is ascribed to the deprotonation of the hydroxyl group in the coumarin nucleus, as typical for other hydroxycoumarins, and lead to a well-defined isosbestic point around 375 nm. By the relationship between the pH and  $\log[(A - A_f)/(A_0 - A)]$ , the pKa constant for the deprotonation of the **3b** hydroxycoumarin was calculated to be 6.7.

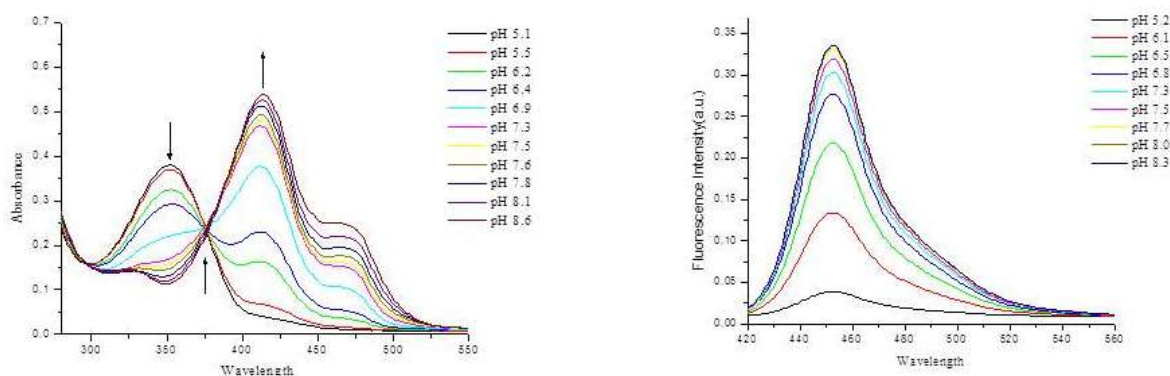

**Fig.S31.** pH titrations of **3b**. Absorption and emission spectrum.

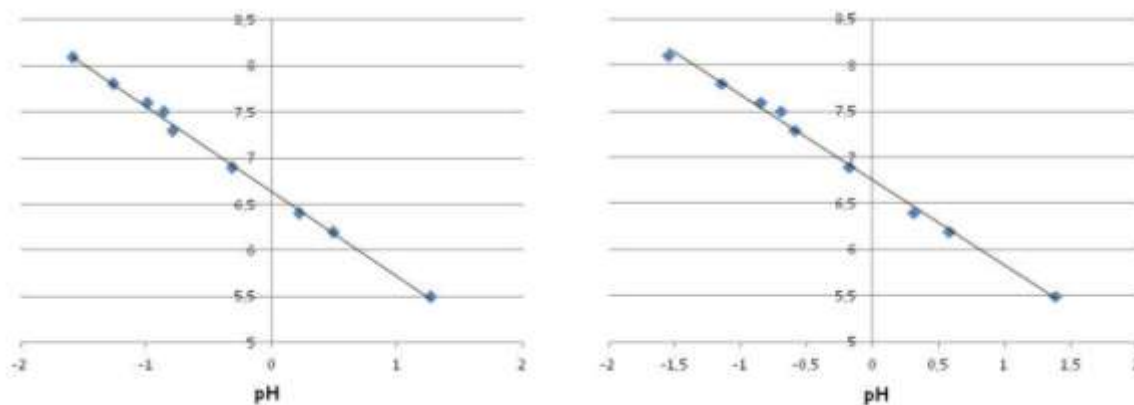

**Fig. S32.** pKa determination of **3b** considering 412nm and 351nm wavelengths.

pKa  $\approx$  6.7.

**Table S1.** Photophysical parameters in water (pH = 3.0) at 298 K.

| Compound  | $\phi_F^a$ |
|-----------|------------|
| <b>3a</b> | 0.048      |
| <b>3b</b> | 0.068      |
| <b>3c</b> | 0.068      |
| <b>3d</b> | 0.066      |
| <b>3h</b> | 0.065      |

<sup>a</sup>Quantum yields were measured by the relative method against the standard compound ethyl-7-OH-coumarin-3-carboxylate ( $\phi = 0.83$  in water) [32].

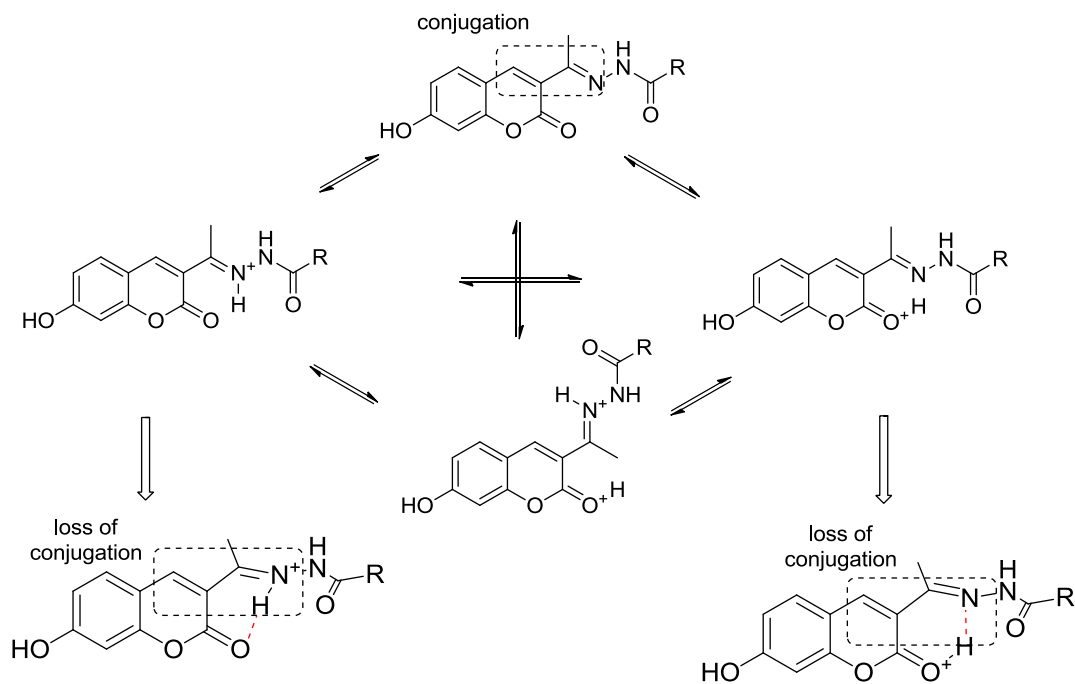

**Fig. S33.** Proposition of protonated states of *N*-acylhydrazone- and Semicarbazone-7-OH-Coumarins
